1 **Patterns and Mechanisms of Sex Ratio Distortion in the**  
2 **Collaborative Cross Mouse Mapping Population**

3

4

5 Brett A. Haines\*, Francesca Barradale†, Beth L. Dumont\*‡

6

7

8 \* The Jackson Laboratory, 600 Main Street, Bar Harbor ME 04609

9 † Department of Biology, Williams College, 59 Lab Campus Drive, Williamstown, MA 01267

10

11 ‡ Tufts University, Graduate School of Biomedical Sciences, 136 Harrison Ave, Boston MA

12 02111

13 Running Title: Sex Ratio Distortion in House Mice

14

15 Key words: sex ratio distortion, Collaborative Cross, intergenomic conflict, sex chromosomes,  
16 ampliconic genes, *Slx*, *Slx11*, *Sly*, Diversity Outbred, house mouse

17

18 Address for Correspondence:

19

20 Beth Dumont

21 The Jackson Laboratory

22 600 Main Street

23 Bar Harbor, ME 04609

24

25 P: 207-288-6647

26 E: [beth.dumont@jax.org](mailto:beth.dumont@jax.org)

27 **ABSTRACT**

28

29 In species with single-locus, chromosome-based mechanisms of sex determination, the laws of  
30 segregation predict an equal ratio of females to males at birth. Here, we show that departures  
31 from this Mendelian expectation are commonplace in the 8-way recombinant inbred  
32 Collaborative Cross (CC) mouse population. More than one-third of CC strains exhibit significant  
33 sex ratio distortion (SRD) at wean, with twice as many male-biased than female-biased strains.  
34 We show that these pervasive sex biases persist across multiple breeding environments, are  
35 stable over time, are not fully mediated by maternal effects, and are not explained by sex-biased  
36 neonatal mortality. SRD exhibits a heritable component, but QTL mapping analyses and  
37 targeted investigations of sex determination genes fail to nominate any large effect loci. These  
38 findings, combined with the reported absence of sex ratio biases in the CC founder strains,  
39 suggest that SRD manifests from multilocus combinations of alleles only uncovered in  
40 recombined CC genomes. We speculate that the genetic shuffling of eight diverse parental  
41 genomes during the early CC breeding generations led to the decoupling of sex-linked drivers  
42 from their co-evolved suppressors, unleashing complex, multiallelic systems of sex  
43 chromosome drive. Consistent with this interpretation, we show that several CC strains exhibit  
44 copy number imbalances at co-evolved X- and Y-linked ampliconic genes that have been  
45 previously implicated in germline genetic conflict and SRD in house mice. Overall, our findings  
46 reveal the pervasiveness of SRD in the CC population and nominate the CC as a powerful  
47 resource for investigating sex chromosome genetic conflict in action.

48

49

50 **ARTICLE SUMMARY**

51 We compiled breeding records from The Collaborative Cross (CC) mouse mapping population  
52 to quantify the frequency and explore potential mechanisms of sex ratio distortion. Strikingly,  
53 more than one-third of CC strains yield significantly sex-biased litters. These sex biases are not  
54 mediated by environmental effects and are moderately heritable. We conclude that the  
55 widespread sex ratio distortion in the CC manifests from multilocus permutations of selfish sex-  
56 linked elements and suppressors that are only recovered in the recombinant CC strains.

57

## 58 INTRODUCTION

59  
60 In species with single locus sex determination, Mendel's rules of inheritance predict an equal  
61 number of males and females at birth. However, departures from this idealized expectation are  
62 common in nature. Many species can manipulate offspring sex ratios based on prevailing  
63 environmental conditions (Hamilton 1967; Nager *et al.* 1999; West and Sheldon 2002), including  
64 season (Drickamer 1990), maternal diet (Rosenfeld *et al.* 2003), and resource availability  
65 (Douhard 2017). Additionally, increasing maternal stress loads lead to skewed sex ratios in  
66 many mammals (Linklater 2007; Helle *et al.* 2008; Ideta *et al.* 2009; Ryan *et al.* 2012).

67  
68 Beyond environmental influences, sex ratio biases can also arise from diverse genetic  
69 mechanisms. At one extreme, a segregating X-linked recessive lethal allele will be  
70 disproportionately associated with male lethality and distort the population sex ratio toward an  
71 excess of females. Although selection should rapidly eliminate such a hypothetical variant from  
72 the population, many mutations exhibit sex-specific phenotypic effects (Karp *et al.* 2017) and  
73 could, therefore, contribute to sex biases in live birth ratios (e.g., McNairn *et al.* 2019). In  
74 addition, prior work from diverse natural and laboratory model systems has demonstrated that  
75 sex-linked selfish elements can drive sex ratio distortion (SRD) by promoting the transmission of  
76 their resident chromosome at the expense of the other sex chromosome (Wood and Newton  
77 1991; Seehausen *et al.* 1999; Cocquet *et al.* 2012; Unckless *et al.* 2015; Lindholm *et al.* 2016;  
78 Helleu *et al.* 2016; Zanders and Unckless 2019; Courret *et al.* 2019).

79  
80 Under most circumstances, the presence of an X-linked (or Y-linked) selfish element will impose  
81 an intense selective pressure for the rapid emergence of a suppressor on the other sex  
82 chromosome, thereby restoring a balanced population sex ratio. Consequently, at any given  
83 point, a population is expected to be at or near sex ratio parity due to the action of counteracting  
84 drive and suppressor elements. However, because different populations evolve independent  
85 drive-suppressor systems, outcrossing can disrupt co-adapted systems of alleles to unmask the  
86 presence of cryptic sex ratio distorters. Indeed, SRD is frequently observed in inter-population  
87 (James and Jaenike 1990; Merçot *et al.* 1995), intersubspecific (Macholán *et al.* 2008; Phadnis  
88 and Orr 2009; Good *et al.* 2010; Cocquet *et al.* 2012; Kruger *et al.* 2019), and interspecific  
89 hybrids (Dermitzakis *et al.* 2000; Tao *et al.* 2001). SRD is also typically associated with reduced  
90 fertility (Phadnis and Orr 2009; Cocquet *et al.* 2010, 2012; Zanders and Unckless 2019),  
91 implying that selfish drive elements often impose a fitness cost.

92  
93 The house mouse (*Mus musculus*) sex chromosomes are crucibles of historical genetic conflict  
94 between feuding drive elements on the X and Y. More than 90% of the house mouse Y  
95 chromosome is comprised of ampliconic genes with X-linked homologous partners that are  
96 theorized to reflect historical bouts of driver-suppressor evolution (Mueller *et al.* 2008; Soh *et al.*  
97 2014). One such family includes the SYCP3-like gene family members, *Slx*, *Slx1*, and *Sly*,  
98 which are present at upwards of 50-100 copies per genome (Scavetta and Tautz 2010; Morgan  
99 and Pardo-Manuel de Villena 2017). The Y-linked gene *Sly* and its X-linked homologs *Slx* and  
100 *Slx1* are selfish drive elements that promote the transmission of their parent chromosome,  
101 although the molecular mechanisms by which this distortion is rendered are not fully  
102 understood. Knockdown or deletion of *Sly* results in over-transmission of the X-chromosome  
103 and female biased-litters (Conway *et al.* 1994; Cocquet *et al.* 2009). Conversely, knockdown or  
104 deletion of *Slx/Slx1* yields male-biased litters (Cocquet *et al.* 2012; Kruger *et al.* 2019).  
105 Although there are striking differences in *Slx/Slx1* and *Sly* copy number among house mouse  
106 subspecies, the ratio of X- to Y-linked copies within subspecies has been maintained in  
107 stoichiometric balance over evolutionary time, presumably as a result of selection for balanced  
108 sex chromosome transmission (Scavetta and Tautz 2010; Morgan and Pardo-Manuel de Villena

109 2017). As expected, experimental crosses between subspecies and wild-caught intersubspecific  
110 F1 house mouse hybrids frequently sire sex-biased litters (Macholán *et al.* 2008; Good *et al.*  
111 2010; Turner *et al.* 2012).

112

113 Regardless of whether it emerges from environmental or genetic causes, SRD imposes  
114 profound impacts on populations. Departure from a 1:1 sex ratio can influence the rate of  
115 population growth, modulate the degree of mate competition, and even modify life-history  
116 trajectories (Hamilton 1967; Le Galliard *et al.* 2005; Székely *et al.* 2014). In addition, SRD can  
117 cause relative levels of diversity and divergence across the sex chromosomes and autosomes  
118 to deviate from their theoretical expectations (Ellegren 2009; Wilson Sayres 2018). Further,  
119 given that many diseases differ in incidence between the sexes (Ober *et al.* 2008; Regitz-  
120 Zagrosek 2012), even subtle shifts in the sex ratio can lead to profound changes in the disease  
121 burden of a population.

122

123 Despite its critical importance for the conservation of biodiversity, population dynamics, and its  
124 role in shaping the genomic architecture of heterogametic vertebrate sex chromosomes, the  
125 underlying biological mechanisms of SRD often remain elusive. In cases of environmentally-  
126 induced SRD, we typically lack a comprehensive mechanistic understanding of how information  
127 gathered from the maternal environment is biochemically relayed to the reproductive track to  
128 manifest SRD (Krackow 1995; Navara 2013). Moreover, the genetic mechanisms that fuel  
129 intergenomic conflicts between the sex chromosomes and lead to SRD are currently understood  
130 at limited molecular resolution (Bravo Núñez *et al.* 2018; Courret *et al.* 2019; Kruger and Mueller  
131 2021). On-going efforts to address these key knowledge gaps would be well-served by the  
132 availability of robust and reproducible animal models equipped with powerful genomic resources  
133 and tools for genetic engineering.

134

135 Toward this goal, we performed an exploratory analysis of the Collaborative Cross (CC) mouse  
136 population to describe the prevalence and define potential causes of SRD in a premiere  
137 mammalian model system (Churchill *et al.* 2004). The CC is an 8-way recombinant inbred panel  
138 of mice developed from eight genetically diverse parental strains: A/J, C57BL/6J, 129S1/SvImJ,  
139 NOD/LtJ, NZO/H1LtJ, CAST/EiJ, PWK/PhJ, and WSB/EiJ. Five of these founder strains (A/J,  
140 C57BL/6J, 129S1/SvImJ, NOD/LtJ, NZO/H1LtJ) are classical inbred mouse strains of  
141 predominantly *M. m. domesticus* ancestry (Yang *et al.* 2007). CAST/EiJ, PWK/PhJ, and  
142 WSB/EiJ are wild-derived inbred strains representing each of the three cardinal house mouse  
143 subspecies (*M. m. castaneus*, *M. m. musculus*, and *M. m. domesticus*, respectively). The  
144 contribution of genetic material from three divergent subspecies, each with variable *Slx/Slx1*  
145 and *Sly* copy numbers, led us to specifically hypothesize considerable scope for genetic SRD in  
146 this multiparent mapping population.

147

148 We collated detailed breeding records from 58 genetically distinct CC strains maintained and  
149 distributed by The Jackson Laboratory to define patterns of SRD across this strain resource. We  
150 find that weak SRD is widespread in the CC. We integrate in-depth analyses of breeding  
151 records with genomic and phenotypic analyses to test the potential action of multiple  
152 mechanisms of SRD. Taken together, our findings underscore the untapped potential of the CC  
153 mouse mapping population to serve as a tool for dissecting the complex genetic mechanisms  
154 and environmental drivers of SRD.

## 155 **METHODS**

156

### 157 **Compilation of Collaborative Cross breeding records**

158 Breeding records were obtained for 58 Collaborative Cross strains maintained in The Jackson  
159 Laboratory's Repository between January 2016 and July 2019. Eleven strains sired <100 pups  
160 surviving to wean age during this time frame and were excluded from further analyses. The data  
161 recorded for each live-born litter include: strain name, unique dam and sire identifiers, dam date  
162 of birth, sire date of birth, date mating established, litter birth date, litter size at birth, litter size at  
163 wean, and the number of weaned males and females. All CC breeding data are provided in  
164 **Table S1**. Strain-level summaries of these breeding data are provided in **Table S2**.

165

166 Breeding records for CC mice maintained at the University of North Carolina Chapel Hill (UNC)  
167 were obtained from the UNC Systems Genetics website  
168 (<http://csbio.unc.edu/CCstatus/index.py?run=availableLines>). These data are also made  
169 available in **Table S3**.

170

171 Breeding records for 43 F1 crosses between distinct CC strains (i.e., CC-RIX crosses) were  
172 kindly shared by colleagues at The Jackson Laboratory and are provided in **Table S4**.

173

174 For brevity, we exclude the laboratory code from CC strain names in figures and tables  
175 throughout this manuscript. Note that in all cases of such ambiguity, we are referencing CC  
176 lines maintained at the Jackson Laboratory.

177

### 178 **Estimating sex ratios and survival statistics**

179 For most analyses, CC strain sex ratios were calculated as the proportion of females at wean.  
180 Sex ratios for CC lines maintained at UNC are presented in public data as the ratio of females to  
181 males at wean. Comparisons of CC strain sex ratios between the JAX and UNC breeding  
182 centers utilize JAX CC strain sex ratios calculated per this alternative definition.

183

184 Neonatal survival was approximated as the fraction of pups born to a given strain that survive to  
185 wean. We acknowledge that this estimate is potentially imprecise, as it is often difficult to  
186 accurately count pups at birth and pups that were cannibalized shortly after birth are likely  
187 missed in these tallies. Litter size at birth was used as a proxy for the *in utero* survival rate.  
188 Although litter size is shaped by a multitude of factors, strains with smaller litters may  
189 experience higher rates of embryonic lethality than strains with larger litter sizes, all else being  
190 equal.

191

192 To estimate survival during early *in utero* development and throughout the neonatal period, we  
193 devised an *ad hoc* metric that combined litter size at birth and survival to wean. Specifically, we  
194 computed the median litter size at birth and median birth-to-wean survival rate across all CC  
195 strains. For a particular focal CC strain, we then computed the difference between the strain-  
196 specific litter size and the overall CC population-wide median litter size. Similarly, we calculated  
197 the difference between the strain-specific survival rate and the overall median survival rate in  
198 the CC population. We then summed these two values into a single measure of aggregate  
199 strain-specific survival from conception to wean.

200

### 201 **Linear modeling and statistical analyses of temporal changes in SRD**

202 The sex of each weaned pup was coded as a binomial indicator and modeled as a function of  
203 strain, birth month, and birth year using the *glm* function in RStudio (v. 1.3.1056). Post-hoc Wald  
204 tests were used to determine whether any independent variables provide a significant

205 explanatory effect. R code to recapitulate these findings is available as a supplementary  
206 document (cc\_srd\_analysis.R) on FigShare.

207

### 208 **Analyses of maternal condition and male reproductive phenotypes**

209 Maternal body mass and body fat percentage estimates for CC strains were obtained from the  
210 McMullan1 and McMullan3 datasets in the Mouse Phenome Database (**Table S5**; (Bogue *et al.*  
211 2020)). We also accessed male reproductive phenotype datasets for CC (Lazear, Shorter3,  
212 Shorter4) and parental inbred strains (Odet1; (Odet *et al.* 2015)) via the Mouse Phenome  
213 Database (**Table S6**). Spearman Rank correlations and Mann-Whitney U-tests were used to  
214 assess relationships between phenotypes and SRD. R code to replicate analyses of maternal  
215 condition (maternalCondition.R) and reproductive phenotypes (ReproPhenotypeAnalysis.R) is  
216 available on FigShare.

217

### 218 **Broad-sense heritability estimation**

219 We treated the sex ratio estimated from weaned pups born to individual CC mating units as  
220 independent, within-strain replicate phenotype measures. Mating units producing fewer than 30  
221 pups over their breeding history were excluded due to the high uncertainty in calculated sex  
222 ratios. We then fit a one-way ANOVA model (sex ratio ~ strain) to estimate the broad-sense  
223 heritability ( $H^2$ ) of the sex ratio at wean using the interclass correlation method (Rutledge *et al.*  
224 2014):

225

$$H^2 = \frac{MSB - MSW}{MSB + (n - 1)MSW}$$

226

227 where MSB and MSW are the mean squares between and within strains, respectively. Despite  
228 being expressed as a proportion, the distribution of sex ratio values across the CC population is  
229 bell-shaped, and we confirmed that a square root transform of the data has no meaningful  
230 impact on the magnitude of our  $H^2$  estimate.

231

### 232 **QTL Mapping**

233 Single QTL mapping was performed using the linear mixed model framework implemented in  
234 the R/qtl2 package (Broman *et al.* 2019). Genotype data at 110,054 unique genomic positions in  
235 each individual CC strain and the CC linkage map were accessed from Dr. Karl Broman's  
236 GitHub page at <https://raw.githubusercontent.com/rqtl/qtl2data/master/CC/cc.zip>. Raw  
237 genotypes were converted to genotype probabilities by invoking the Carter-Falconer mapping  
238 function and assuming an error probability of 0.002. Relatedness among CC lines was specified  
239 via a kinship matrix using the leave-one-chromosome-out method. QTL significance thresholds  
240 were computed from 1000 permutations of the data.

241

242 We tested for significant effects of the Y and mitochondrial chromosomes on SRD using one-  
243 way ANOVA, treating the strain origin of the Y chromosome (or mitochondrial genome) as a  
244 factor.

245

246 R code to replicate QTL mapping and testing for Y and mitochondrial effects is available on  
247 FigShare (qtlMapping\_sexRatio.R).

248

### 249 **Read mapping and Structural Variant Discovery**

250 Whole genome sequences for the completed CC strains were previously released for  
251 community use (Srivastava *et al.* 2017; Shorter *et al.* 2019b). Fastq files for each CC sample  
252 were downloaded from the ENA archive under Project PRJEB14673. Fastq files for five CC  
253 lines (CC019, CC026, CC049, CC070, and CC076) were corrupted and we were unable to  
254 pursue genomic analyses with these strains.

255  
256 Fastq files were first processed with *fastp* (version 0.20.1) to remove adaptor sequences and  
257 evaluate QC metrics (Chen *et al.* 2018). Reads were then mapped to the mm10 reference  
258 assembly using default parameter settings in *bwa mem* (version 0.7.17) (Li 2013). Optical  
259 duplicates were marked using the MarkDuplicatesSpark command within GATK (version  
260 4.1.8.1; (Van der Auwera and O'Connor 2020)). Structural variant (SV) discovery was  
261 performed individually on each CC genome using *manta* (version 1.6.0; (Chen *et al.* 2016)). The  
262 resulting SV vcf files were reformatted using the python script *convertInversion.py* supplied with  
263 the manta distribution and subset to include only the non-ampliconic portion of the Y  
264 chromosome (chrY:1-6.664Mb). The resulting vcf files were then uploaded into the Integrative  
265 Genomics Viewer (IGV; version 2.8.0; (Robinson *et al.* 2011)) for manual inspection.  
266

### 267 **Estimation of gene copy number for ampliconic sex-linked families**

268 Depth of coverage was computed in 1kb non-overlapping sliding windows using *mosdepth*  
269 (version 1.18), ignoring read duplicates (Pedersen and Quinlan 2018). Coverage values were  
270 then corrected for GC biases using a custom R script (*compute\_GC\_depth\_correction.R*;  
271 available on FigShare). Briefly, for each strain genome, we computed the average read depth  
272 across autosomal regions with identical GC content, excluding outlier windows with  $>2\times$  and  
273  $<0.333\times$  the average autosomal coverage. We then used LOESS regression to fit a second-  
274 degree polynomial (span parameter = 0.7) to the data to model the empirical relationship  
275 between GC-content and average depth across the genome. The difference between the  
276 genome-wide average read depth and the predicted read depth for a given GC-content value  
277 corresponds to the average over- or under-representation of sequenced reads derived from  
278 regions in that GC-content bin. These values were used as correction factors to adjust the  
279 observed read depth in a given 1kb window based on its GC-content. GC-corrected read depths  
280 were then standardized by the average genome-wide coverage to convert to copy number  
281 estimates. Finally, data were compiled in bedGraph format for custom visualization in IGV.  
282 bedgraph format files are provided on FigShare.  
283

284 To estimate the copy number of the X and Y-linked ampliconic genes *Slx/Slx1*, *Sly*, *Sstx*, and  
285 *Ssty1/2*, we first identified the reference coordinates of all annotated paralogs from these genes  
286 using the Ensembl Paralogues feature. To discover any additional unannotated paralogs, we  
287 blasted each annotated paralog sequence against the mm10 reference, retaining full-length hits  
288 with  $>90\%$  sequence identity to the parent sequence. Genomic coordinates for all ampliconic  
289 genes are provided in **Table S7**. For each CC strain, we then summed the average read depth  
290 across all paralogs to obtain an overall estimate of gene family copy number.  
291

### 292 **Copy number quantification by droplet digital PCR**

293 *Slx*, *Slx1*, and *Sly* copy number states were independently confirmed in a representative  
294 sample of six CC strains (CC032/GeniUncJ, CC011/UncJ, CC003/UncJ, CC004/TauUncJ,  
295 CC028/GeniUncJ, CC061/GeniUncJ) using droplet digital PCR (ddPCR). Genomic DNA was  
296 isolated from spleen tissue using a Qiagen DNAeasy kit following manufacturer  
297 recommendations. DNA was subsequently restriction digested with *HaeIII* for 60 minutes at  
298 37C. DNA was then diluted 1:100 and 1:10 and combined with QX200 ddPCR EvaGreen  
299 Supermix (BioRad) and custom-designed primers targeting either *Slx/Slx1*, *Sly*, or the diploid  
300 control *Rpp30* locus (**Table S8**) per vendor protocols. The PCR reaction mixture was then  
301 partitioned into droplets using a QX200 AutoDG Droplet Generator (BioRad). Emulsified  
302 reactions were cycled on a C1000 Touch Thermocycler (BioRad) according to the following  
303 program: 5 min initial denaturation at 95C; 40 cycles of 30s elongation at 95C, 30s of annealing  
304 at 55C, and 60s elongation at 72C; and a final 15 min incubation at 4C to stabilize fluorescent  
305 signals. Completed reactions were then held at 20C until removal from the thermocycler. Finally,



306 reaction products were loaded into a QX200 Droplet reader and analyzed using QuantaSoft  
307 Analysis Pro Software (v. 1.0.596; BioRad). Copy number estimates were standardized to  
308 *Rpp30* and averaged across a minimum of two technical replicates at each DNA concentration.  
309 Final copy number estimates were then averaged across the two analyzed concentrations.

310

### 311 **Animal Husbandry and Use Statement**

312 Collaborative Cross strains were obtained from the Jackson Laboratory's Repository and  
313 housed in a low barrier room in accordance with an animal care protocol approved by The  
314 Jackson Laboratory's Animal Care and Use Committee (Protocol # 17021). Mice were provided  
315 with food and water *ad libitum*. Sexually mature males were euthanized by exposure to CO<sub>2</sub> at  
316 10-14 weeks of age.

317

### 318 **Testis Histology**

319 Whole testes from three CC032/GeniUncJ males were fixed in Bouin's fixative overnight at 4C  
320 and then rinsed in a sequential ethanol series (25%, 50%, 3x 70% for 5 minutes each). Fixed  
321 tissues were then submitted to the Histopathology Sciences Service at The Jackson Laboratory  
322 for paraffin embedding, 5 µm cross-sectioning, and regressive staining with Mayer's  
323 Hematoxylin and Eosin-Y. Slides were then scanned on a Hamamatsu NDP Nanozoomer at 40x  
324 magnification and analyzed using NDP.view2 software.

325

326 Two independent cross-sections from two of the three biological replicates were then scored for  
327 the following testis histology phenotypes: the total number of tubules per cross-section, total  
328 cross section area, the number of tubules with vacuoles, the number of tubules with eosinophilic  
329 cells (a proxy for cell death), and the cross-sectional area of 50 representative tubules. Testis  
330 cross-sections from the third CC032/GeniUncJ replicate exhibited an unusually high fraction  
331 (>50%) of vacuolized tubules harboring no post-meiotic cells (**Figure S1**). Inclusion of data from  
332 this sample vastly skewed the estimates from other replicates and was dropped from the  
333 analysis. Due to the limited number of surveyed replicates, we cannot exclude the possibility  
334 that this vacuolized seminiferous tubule phenotype affects a reproducible subset of  
335 CC032/GeniUncJ males, as previously reported for inbred WSB/EiJ males (Odet *et al.* 2015).

336

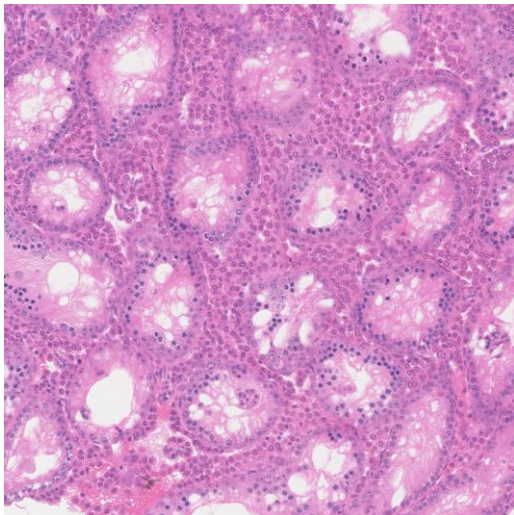

337

338 **Figure S1.** Hematoxylin and Eosin-Y stained testis cross section from a CC032/GeniUncJ male  
339 at ~40x magnification. A high proportion of seminiferous tubules exhibit large vacuoles and  
340 germ cell loss.

341

342

### 343 **Sperm whole chromosome painting**

344 Sperm specimens were prepared for whole chromosome painting as described (Sarrate and  
345 Anton 2009; Dumont 2017). Sperm were passively isolated from the caudal epididymis in a drop  
346 of sterile PBS at room temperature, then concentrated by centrifugation and gradually  
347 resuspended in ~1mL of Carnoy's fixative. Several drops of fixed sperm were then spread  
348 across a cleaned glass slide and allowed to air-dry. Slides were then rinsed in two successive  
349 washes of 2x SSC for 3 min each, dehydrated in a sequential ethanol series (70, 90, 100% for 2  
350 minutes at each concentration), and air-dried. Next, slides were washed in dithiothreitol solution  
351 (5 mM 1,4-dithiothreitol, 1% Triton X-100, and 50 mM Tris) to decondense sperm DNA and  
352 rinsed again in two consecutive washes of 2x SSC, dehydrated in a sequential ethanol series  
353 (70, 90, 100%), and air-dried.

354

355 Sperm DNA was denatured in 70% formamide/2x SSC at 78C for 5 min. Slides were then  
356 processed through a sequential ethanol series (70%, 85%, 100% for 1 min each dilution) and  
357 air-dried. Simultaneously, Texas-Red labeled X chromosome and FITC-labeled Y chromosome  
358 probes (Cytocell) were denatured for 10 minutes at 80C per vendor recommendations. Sperm  
359 slides were then painted with a total volume of 10  $\mu$ L of denatured probes, a cover slip was  
360 applied to the hybridized area, and sealed in place with rubber cement. Hybridization reactions  
361 were allowed to process for ~48 hr at 37C.

362

363 After removing coverslips, slides were washed in 0.4x SSC/0.3% NP-40 at 74C for 2 minutes,  
364 and 2xSSC/0.1% NP-40 at room temperature for 1 minute. After air-drying, slides were mounted  
365 in ProLong Gold antifade media with DAPI (Invitrogen) and cover slipped.

366

367 Approximately ~1400 painted sperm cells were imaged on a Leica DM6 B upright epifluorescent  
368 microscope equipped with GFP and Texas Red fluorescent filters and a cooled monochrome  
369 2.8-megapixel digital camera. Images were post-processed and analyzed in the Fiji software  
370 package (Schindelin *et al.* 2012). Individual sperm were scored as carrying an X or Y  
371 chromosome based on fluorescent signal (**Table S9**). As no significant difference in the  
372 frequency of X- versus Y-bearing sperm was noted in an initial sample, we did not perform  
373 experiments on additional biological replicates or dye-swap probe combinations.

374

### 375 **Sex ratio distortion in the Diversity Outbred population**

376 Breeding records for the 175 Diversity Outbred (DO) breeding lineages were obtained from the  
377 supplemental material of (Chesler *et al.* 2016) and are available in **Table S10**. These records  
378 detail the parentage of litters born over 17 continuous generations of outbreeding (G6-G22). To  
379 identify DO lineages siring sex-biased litters, we employed binomial tests to ask whether the sex  
380 ratio of weaned pups born to females (or males) from each DO breeding lineage deviated from  
381 the expected 1:1 ratio. An R script for reproducing this analysis is available on FigShare  
382 (do\_srd\_analysis.R).

383

### 384 **Data availability**

385 The authors state that all data necessary for confirming the conclusions presented in this article  
386 are represented fully within the article and supplemental material. R scripts for reproducing  
387 analyses and figures are available on FigShare. VCF files with structural variant calls are  
388 available upon reasonable request from the corresponding author.

## 389 **RESULTS**

390

### 391 **Widespread Sex Ratio Distortion in the Mouse Collaborative Cross**

392 We collated breeding records from the Collaborative Cross mouse colony maintained in The  
393 Jackson Laboratory's Repository (**Table S1**). These records summarize the breeding  
394 performance of 58 inbred CC strains organized into 3,890 independent mating units that  
395 produced 54,034 pups between January 2016 and May 2019 (median = 874 pups per strain).  
396 Eleven strains produced fewer than 100 pups during this time period and were excluded from  
397 further analysis. Remarkably, 18 of the remaining 47 CC lines (38%) sired progeny with a  
398 significant departure from the expected 1:1 sex ratio (uncorrected binomial  $P < 0.05$ ; **Figure 1**).  
399 Of these 18 strains, 12 are significantly male-biased, whereas six produce an excess of  
400 females. This finding aligns with the significant, albeit slight, skew toward males in the  
401 aggregate CC population breeding records (21,469 males versus 20,439 females; two-sided  
402 binomial  $P = 4.99 \times 10^{-7}$ ). The most significantly female-biased strain, CC065/UncJ, produces  
403 67.4% females ( $n = 264$ ; Binomial Test  $P = 1.54 \times 10^{-8}$ ). CC032/GeniUncJ is the most male-  
404 biased strain, siring 68.6% males at wean ( $n = 927$ ;  $P = 2.83 \times 10^{-30}$ ).

405  
406 Statistical power to detect a significant departure from the expected Mendelian sex ratio is a  
407 function of sample size. Many CC strains produced a modest number of pups over the survey  
408 period, limiting our ability to detect weak SRD. Considering only those strains with  $>500$  pups  
409 (corresponding to  $\sim 60\%$  power to detect a 45%:55% skew in the sex ratio; **Figure S2**), the  
410 percentage of strains with significant SRD increases to 50%. We conclude that mild SRD is  
411 pervasive in the CC reference mapping population, with a few strains showing extreme biases in  
412 offspring sex ratios.

413

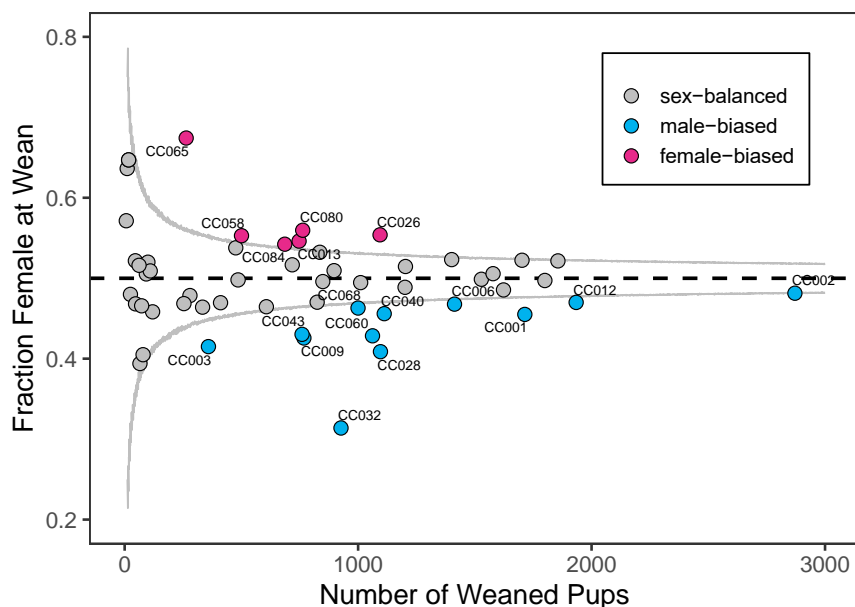

414

415

416 **Figure 1.** Sex ratio distortion in the realized Collaborative Cross population. Sex ratio is  
417 expressed as the fraction of females at wean. The gray curved lines denote the level of noise  
418 about the Mendelian expectation of 0.5 (dashed horizontal black line) that can be expected for a  
419 given sample size due to binomial sampling error. Strains producing significantly male- and  
420 female-biased litters are color-coded blue and red, respectively.

421

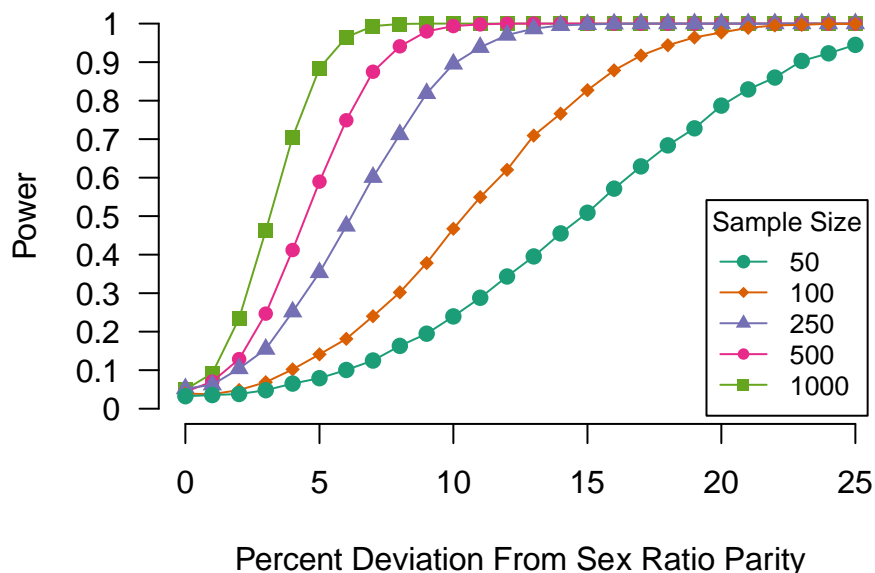

422  
423  
424 **Figure S2.** Statistical power to detect sex ratio distortion using a two-way binomial test. Colors  
425 and plotting shapes denote different sample sizes.  
426

427  
428 **Testing the Stability of SRD to Environmental Influences**  
429 Seasonal fluctuations in external temperatures can influence offspring sex in captive laboratory  
430 house mouse populations (Drickamer 1990). To test for seasonal and larger-term temporal  
431 effects on SRD in the CC, we modeled the sex of each weaned pup as a binomial outcome of  
432 strain identity, birth month, and birth year. Neither birth month nor birth year provide significant  
433 predictive power in this model (birth month, Wald Test  $P = 0.74$ ; birth year, Wald Test  $P = 0.17$ ).  
434 These findings are recapitulated on a per strain basis: there is no evidence for variation in sex  
435 ratio from month-to-month within strains (Fisher's Exact Test,  $P > 0.05$ ; **Table S11**).  
436 CC028/GeniUncJ and CC084/TauJ show slight variation in sex ratio from year-to-year (**Figure**  
437 **S3**; Fisher's Exact Test;  $P_{CC028}=0.0365$  and  $P_{CC084}=0.0500$ ), although these effects are modest  
438 and do not remain significant after correcting for multiple testing.  
439

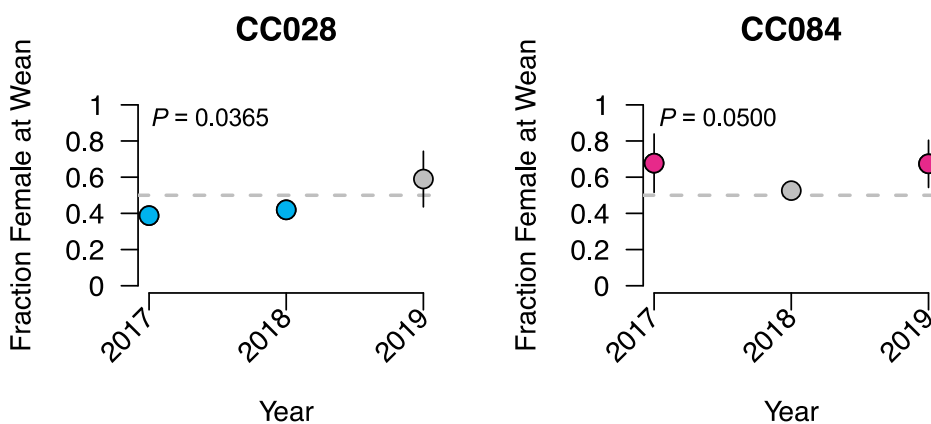

440  
441 **Figure S3.** The fraction of females at wean exhibits mild variation over time for  
442 CC028/GeniUncJ and CC084/TauJ. Error bars correspond to 95% binomial confidence

443 intervals. Sex ratios are estimated with high precision for some strain-year combinations, and  
444 confidence intervals are masked by the plotting characters. Samples with significant male- and  
445 female- sex biases are color coded blue and red, respectively.

446  
447

448 To understand whether housing environment influences SRD in the CC, we next assessed the  
449 concordance of JAX CC strain sex ratios with those of their sister-strain counterparts maintained  
450 at an independent mouse facility at University of North Carolina (UNC) Chapel-Hill. Overall,  
451 there is excellent concordance of the strain sex ratios between these two locations (Spearman's  
452  $\text{Rho} = 0.760$ ,  $P = 1.97 \times 10^{-8}$ ; **Figure 2**). Notably, CC032 and CC065 are the most strongly male-  
453 and female-biased strains, respectively, regardless of facility. Despite this overall agreement,  
454 there are minor exceptions. For example, two strains that produce slightly male-biased strains at  
455 JAX – CC060/UncJ and CC002/UncJ – fail to produce male-biased litters at UNC. These slight  
456 discrepancies are likely attributable to binomial sampling error, rather than the accumulation of  
457 independent mutations with effects on offspring sex ratio in the JAX and/or UNC colonies (*i.e.*,  
458 strain drift) or strain-by-environment interactions.

459

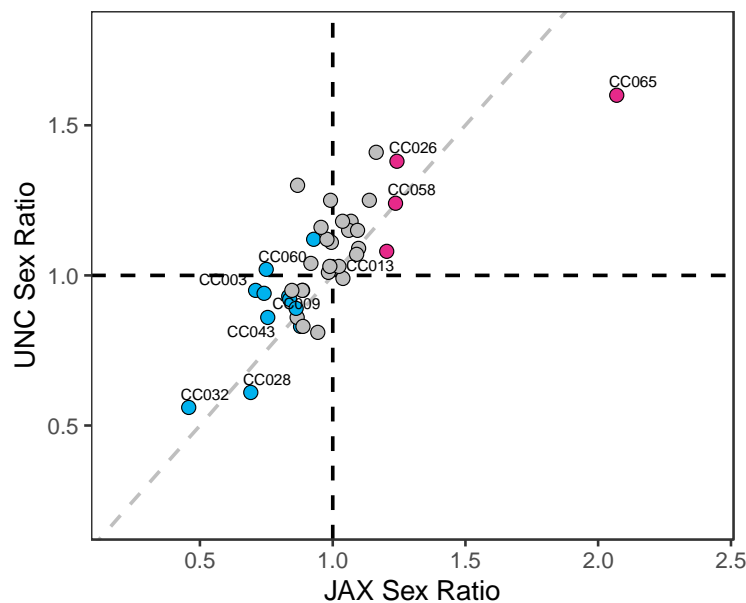

460

461 **Figure 2.** Sex ratios of CC strains maintained at JAX and UNC. Sex ratios on both axes are  
462 expressed as the number of females to the number of males at wean. Strains that are  
463 significantly female- and male-biased at JAX are color-coded red and blue, respectively. The  
464 dashed gray diagonal line represents  $y=x$ .

465

466

#### 467 **Sex ratio is not influenced by maternal effects or breeding performance**

468 Maternal condition has been shown to modulate live-birth sex ratios in many organisms (Nager  
469 *et al.* 1999; Love *et al.* 2005). Using publicly available CC mouse phenotypes (Bogue *et al.*  
470 2020; **Table S5**), we examined the relationship between sex ratio and two proxies of overall  
471 maternal health: adult female body mass and body fat percentage. Sex-biased strains do not  
472 have significantly different body mass or body fat percentages compared to sex-balanced  
473 strains (Mann-Whitney U-Test;  $P > 0.05$ ; **Figure S4**). Similarly, there is no significant difference  
474 in body mass between female-biased strains and sex-balanced strains, or between male-biased  
475 strains and sex-balanced strains (Mann-Whitney U-Test;  $P > 0.05$ ). Although we find no

476 significant link between these two metrics of overall maternal condition and offspring sex ratio,  
477 we acknowledge that female-specific estimates of condition, rather than the strain-wide  
478 estimates employed here, are most appropriate for rigorously testing this possible explanation  
479 for SRD.  
480

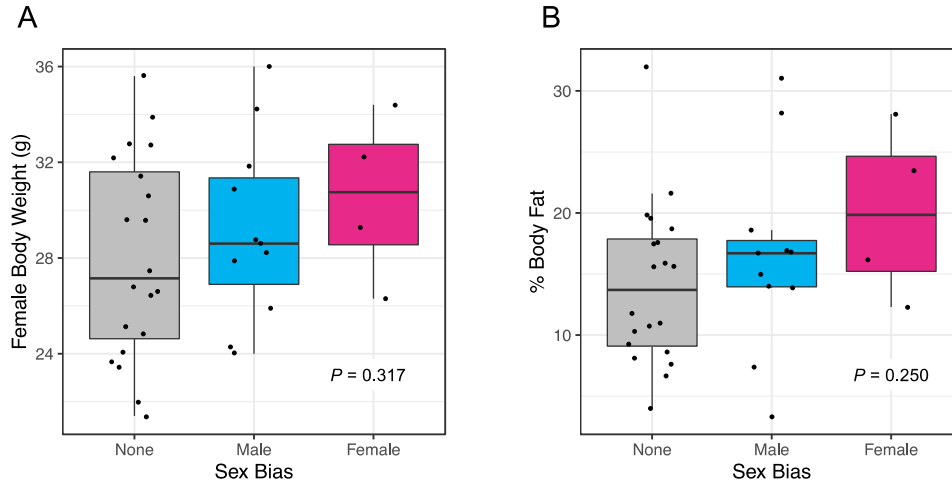

481  
482 **Figure S4.** Relationship between sex ratio bias and mean adult female (A) body weight and (B)  
483 body fat percentage. Each point corresponds to a single CC strain. CC strains are designated  
484 as male- or female-biased based according to per-strain binomial tests ( $P < 0.05$ ).  
485

486  
487 We next considered the possibility that random, non-genetic maternal effects influence offspring  
488 sex in the CC. In the majority of CC strains, offspring sex does not vary from dam-to-dam within  
489 a strain (Fisher's Exact Test;  $P > 0.05$ ; **Table S12**). We do observe slight fluctuations in sex ratio  
490 across breeding dams in CC004/TauUncJ ( $P = 0.013$ ), CC061/GeniUncJ ( $P = 0.008$ ), and  
491 CC068/TauUncJ ( $P = 0.033$ ), although these effects are not significant after accounting for  
492 multiple testing (**Figure S5**; 42 tested strains, Bonferroni adjusted  $P = 0.0012$ ).

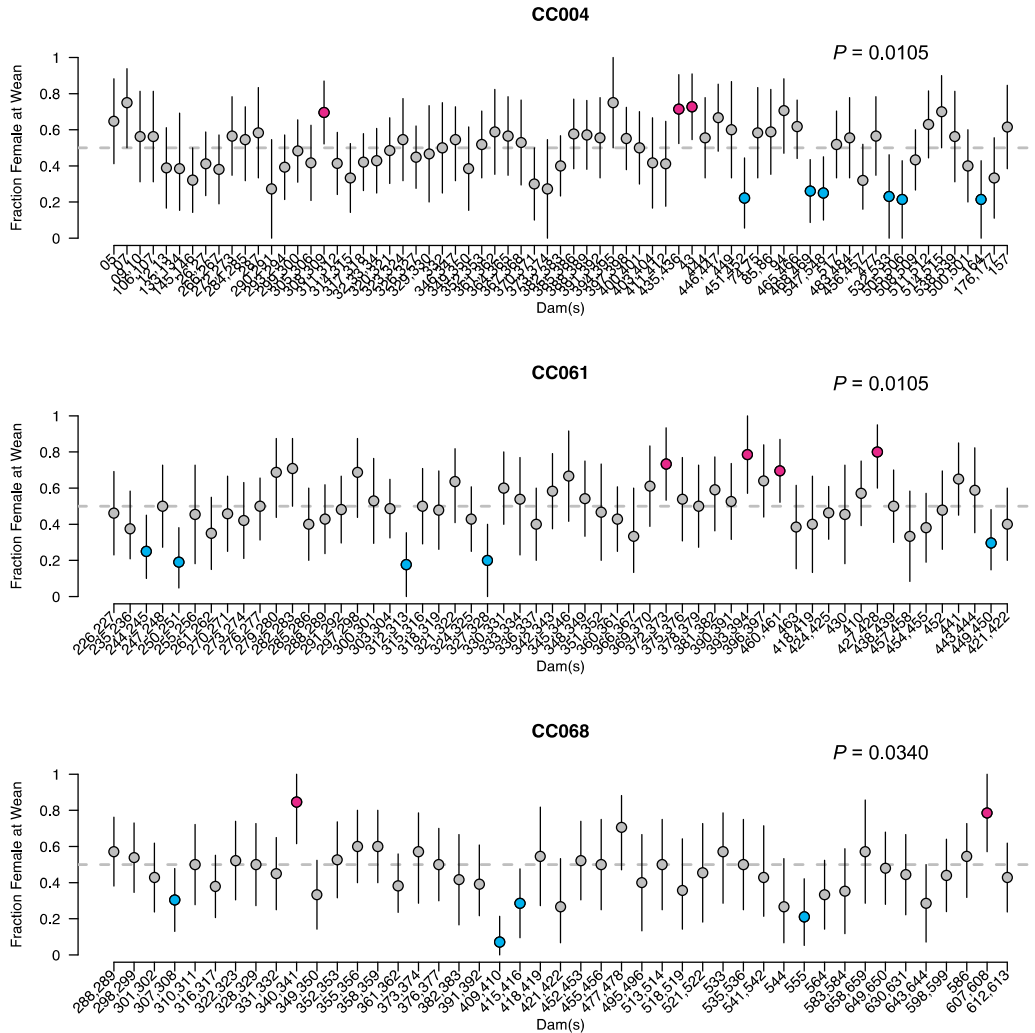

493  
494 **Figure S5.** Dam identity exerts a weak influence on offspring sex ratios in CC004/TauUncJ,  
495 CC061/GeniUncJ, and CC068/TauUncJ. For each strain, the sex ratio of animals sired by each  
496 dam (or pair of dams, in the case of trio matings) is plotted as the fraction of females at wean.  
497 Dams producing significantly female- or male-biased litters are denoted by the red and blue  
498 points, respectively. Error bars correspond to 95% confidence intervals calculated from the  
499 binomial distribution.

500  
501  
502 Prior work has uncovered significant effects of parental age and litter parity number on  
503 mammalian sex ratios (Huck *et al.* 1988). Parental age at litter birth, litter size, and the number  
504 of litters born to each mating unit vary among CC strains (**Table S2**), prompting us to explore  
505 whether these variables contribute to the observed SRD. We modeled the sex of each weaned  
506 pup as a binomial outcome of strain identity and either dam or sire age. Parental age does not  
507 offer significant explanatory power in this model ( $P > 0.05$ ). Similarly, litter size and litter number  
508 do not impact estimated sex ratios ( $P > 0.05$ ).

### 509 **Sex ratio distortion is independent of maternal genotype**

510 Different maternal genotypes provide distinct uterine environments for early development and  
511 could modify sex ratios in crosses involving sires from a common strain. We leveraged breeding  
512 data from crosses between distinct CC strains (*i.e.*, CC-RIX crosses) carried out by colleagues  
513

514 at The Jackson Laboratory to address whether maternal genotype influences CC sex ratios. In  
515 total, we surveyed data from 43 CC-RIX crosses profiling 24 different CC strains as sires (**Table**  
516 **S4**). If sex ratio is strictly determined by the paternal transmission of X- versus Y-bearing sperm,  
517 then the sex ratios of litters sired by males from different CC strains should be independent of  
518 dam genotype. For each of the 24 CC sire strains included in this CC-RIX dataset, we asked  
519 whether offspring sex varies as a function of dam strain identity. Although small sample sizes  
520 limit our power (range: 13-103 progeny per CC-RIX cross; median = 31), we find no consistent  
521 evidence for maternal genotype-dependence of sex ratios in the majority of the CC-RIX strains  
522 tested (Fisher's Exact Test  $P > 0.05$ ; **Table S13**; **Figures S6, S7**). Three CC strains are  
523 exceptions, with marginal maternal genotype dependence on offspring sex ratios:  
524 CC027/GeniUncJ ( $P = 5.2 \times 10^{-4}$ ), CC042/GeniUncJ ( $P = 0.038$ ), and CC060/UncJ ( $P = 0.010$ )  
525 (**Figure S6**). Notably, CC027/GeniUncJ males, when mated to CC027/GeniUncJ or  
526 CC011/UncJ females, produced sex-balanced litters, but yield female-biased litters in crosses to  
527 CC037/TauUncJ dams and male-biased litters in crosses to CC002/UncJ dams (**Figure S6B**).  
528 Similarly, CC042/GeniUncJ males produce litters with a slight female bias in crosses with either  
529 CC042/GeniUncJ or CC001/UncJ dams, and male-biased progeny in crosses to  
530 CC005/TauUncJ females (**Figure S6A**). However, we caution that only the maternal effects in  
531 CC027/GeniUncJ remain significant after correction for multiple tests. Overall, these findings are  
532 in broad agreement with the absence of significant maternal genotype effects on sex ratios in  
533 the eight parental founder strains of the CC (Shorter *et al.* 2019a).

534  
535 In summary, we find no evidence that season, housing environment, dam identity, parental age,  
536 litter number, litter size, maternal condition, or maternal genotype systematically influence sex  
537 ratios across the CC strains. Based on these findings, we conclude that the sex ratio of a given  
538 CC strain is likely an intrinsic, biological property of that strain, rather than a plastic response to  
539 environmental factors or mediated via parental effects.  
540

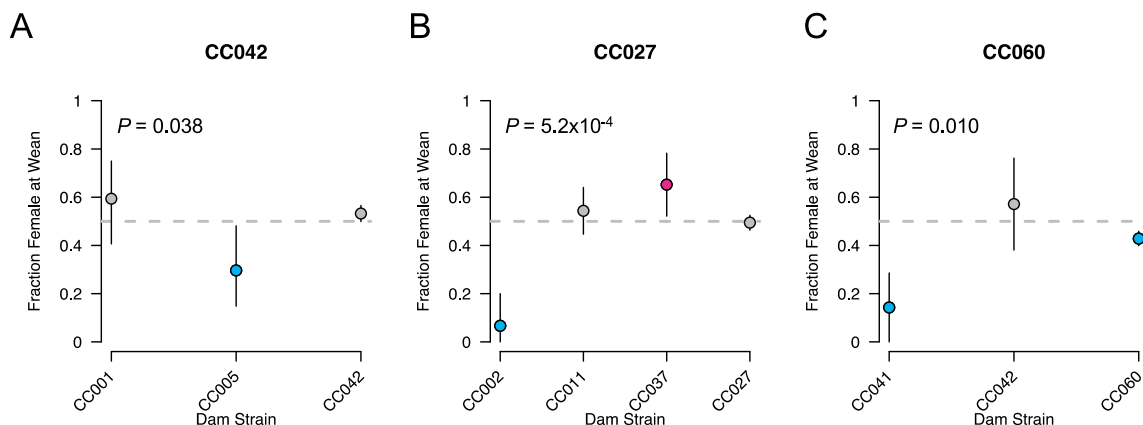

541  
542 **Figure S6.** CC males from strains (A) CC042/GeniUncJ, (B) CC027/GeniUncJ, and (C)  
543 CC060/UncJ sire litters with variable sex ratios depending on the genetic background of the  
544 dam. Error bars correspond to 95% confidence intervals calculated from the binomial  
545 distribution. Dam strains producing significantly male- or female-biased litters are color-coded  
546 blue and red, respectively.



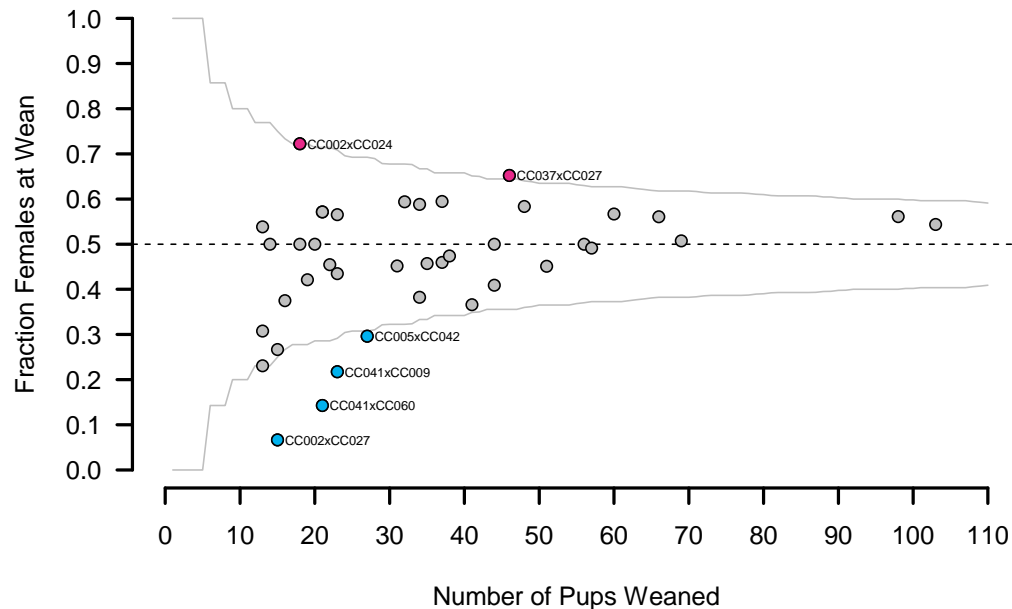

547  
548 **Figure S7.** Sex ratio distortion in CC-RIX mice. The horizontal dashed line corresponds to the  
549 expected 1:1 sex ratio. The gray solid curves delimit the range of sex ratio variation expected  
550 due to binomial sampling for a given sample size. Crosses that yield significantly female- or  
551 male-biased litters are shown in red and blue, respectively. Point labels specify the associated  
552 CC-RIX cross in the format: dam x sire.  
553

554  
555 **Evaluating sex differences in survival as a potential mechanism of sex ratio distortion**  
556 SRD can arise along a continuum of developmental timepoints ranging from differences in the  
557 viability or fertilization efficiency of X- versus Y-bearing sperm to sex differences in post-birth  
558 survival. If SRD stems from sex differences in survival during *in utero* development, more  
559 extremely sex-biased strains should yield smaller litters. In contrast to this expectation, there is  
560 no correlation between litter size and the absolute deviation from sex ratio parity in the CC  
561 population (**Figure 3A**; Spearman's  $Rho = -0.036$ ,  $P = 0.819$ ; analysis restricted to breeding  
562 pairs only, to the exclusion of breeding trios and harem breeding units). Indeed, several sex-  
563 biased strains - including CC013/GeniUncJ, CC060/UncJ, CC006/TauUncJ, and CC001/UncJ -  
564 are among the most fecund CC lines. Similarly, sex differences in survival from birth to wean  
565 are not correlated with SRD (**Figure 3B**; Spearman's  $Rho = -0.0817$ ,  $P = 0.601$ ).  
566

567 Mechanisms that contribute to increased rates of strain death *in utero* may also lead to  
568 increased death rates in neonates. Consistent with this possibility, there is a significant positive  
569 correlation between litter size and birth-to-wean survival rate; strains with larger litters at birth  
570 have lower neonatal death rates (**Figure 3C**; Spearman's  $Rho = 0.426$ ,  $P = 0.005$ ). We  
571 combined these two measures of survival during pre- and post-natal development into a single  
572 statistic that summarizes strain variation in survival from conception to wean (see Methods).  
573 Again, we find no significant correlation between this composite survival statistic and the  
574 magnitude of SRD (**Figure 3D**; Spearman's  $Rho = -0.0467$ ,  $P = 0.766$ ).  
575

576 The absence of an overall association between survival in early development and SRD  
 577 suggests that mortality in early life does not provide a simple, unifying explanation for SRD  
 578 in the CC. However, it is noteworthy that two of the 18 significantly sex-biased strains are among  
 579 the 20% of CC strains with the lowest survival rates (CC026/GeniUncJ and CC040/TauUncJ;  
 580 **Figure 3D**). Sex differences in early development may contribute to SRD in certain strains, and  
 581 these findings motivate further work to dissect the developmental mechanisms of potential sex-  
 582 specific mortality in these lines. Nonetheless, survival differences are unlikely to explain SRD in  
 583 the majority of sex-biased strains.

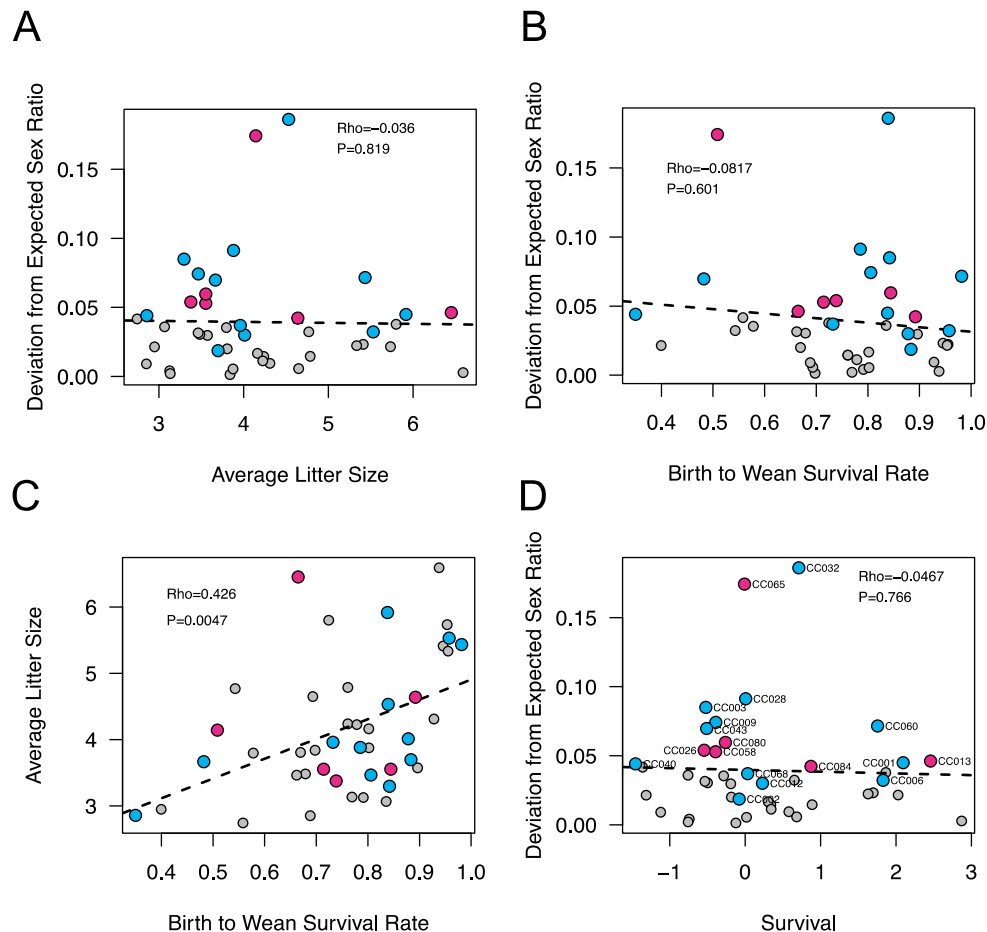

584 **Figure 3.** Correlations between neonatal survival, litter size, and sex ratio distortion. Sex ratio  
 585 distortion is not significantly correlated with average litter size (A) or birth to wean survival rate  
 586 (B). Average litter size at birth and survival to wean are positively correlated (C). The strength of  
 587 sex ratio distortion is not correlated with aggregated *in utero* and birth-to-wean survival. Points  
 588 corresponding to strains with significant female- and male-bias are color-coded red and blue,  
 589 respectively.

591  
 592  
 593 **No Evidence for Single Locus Mechanisms of Sex Ratio Distortion**

594 Our extensive analyses of possible non-genetic explanations for sex ratio variation in the CC  
 595 turned up no compelling explanations, suggesting that sex ratio variation likely carries a genetic  
 596 basis. We utilized sex ratio estimates from independent breeding units within each CC strain as  
 597 biological replicates to compute the relative proportion of variation in the sex ratio that is due to  
 598 within versus between strain differences (*i.e.*, broad sense heritability,  $H^2$ ; see Methods).

599 Despite considerable binomial noise in sex ratio estimates per breeding unit, the sex ratio is  
600 modestly heritable in the CC ( $H^2 = 0.263$ ).

601  
602 To attempt to map genomic loci contributing to this heritable variation in SRD, we carried out a  
603 genome-wide QTL scan in the CC. No autosomal or X-linked loci reached the genome-wide  
604 threshold for significance (**Figure 4A**). Similarly, we find no effect of the Y chromosome or  
605 mitochondrial haplotype on SRD (one-way ANOVA,  $P > 0.05$ ; **Figures 4B and 4C**). Although  
606 the small number of CC strains severely limits mapping power, we conclude that very large-  
607 effect, single-locus modifiers of SRD are not likely segregating in the CC population.

608  
609 This conclusion is bolstered by the observation that sex ratios in seven of the eight inbred CC  
610 founder strains do not deviate from the expected 1:1 ratio of males:females (Shorter *et al.*  
611 2019a). Founder strain 129S1/SvlmJ produces a slight bias toward females (52.5%), but this  
612 distortion is mild compared to that observed in the most extreme CC strains. In conjunction with  
613 the overall absence of evidence for environmental or parental effects on SRD, these findings  
614 raise the possibility that multilocus allelic combinations only uncovered in recombinant CC  
615 genomes contribute to the widespread SRD in this multiparent mapping population.  
616 Unfortunately, the modest number of realized CC strains effectively bars the application of  
617 unbiased pairwise scans for such interacting loci.

618

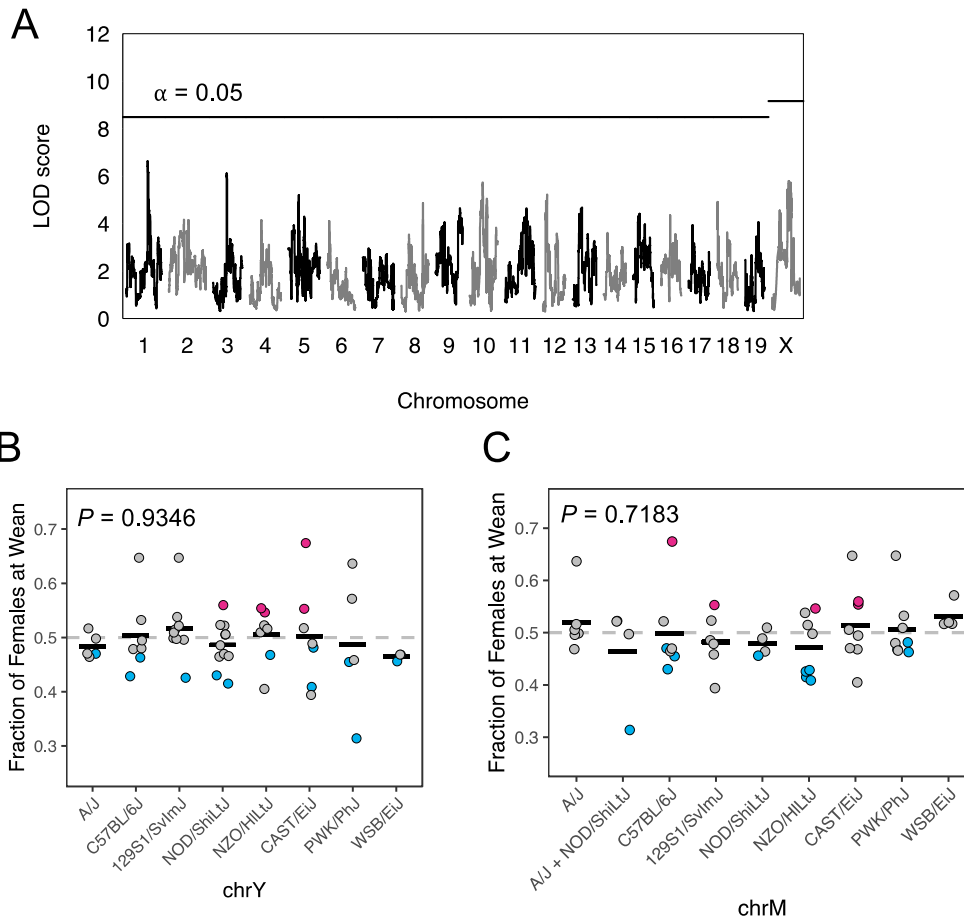

619 **Figure 4.** Mapping single locus modifiers of SRD in the CC. (A) Genome wide scan for loci  
620 influencing SRD in 49 CC strains. Horizontal lines correspond to the genome-wide permutation-  
621

622 derived thresholds for the autosomes and X chromosome. Fraction of females at wean for CC  
623 strains partitioned by the parental strain origin of the Y chromosome (B) and mitochondrial (C)  
624 haplotype. Strains with significantly male- and female-biased sex ratios are color-coded blue  
625 and red, respectively.

626  
627

### 628 **Structural mutations at sex determination genes are unlikely to mediate SRD in the CC**

629 Structural mutations encompassing key sex determination genes can lead to disparities  
630 between phenotypic sex and sex chromosome genotype and could, potentially, manifest as  
631 SRD. In most mammals, including house mice, sex is determined by the expression of a Y-  
632 linked gene, *Sry*, in the undifferentiated gonad. Deletion or translocation of *Sry* from chrY  
633 represent established genetic mechanisms for sex reversal in mammals (McElreavy *et al.* 1992;  
634 Goodfellow and Lovell-Badge).

635

636 To explore the possibility that phenotypic sex is not a reliable indicator of sex chromosome  
637 transmission in the CC, we scanned CC whole genome sequences (Srivastava *et al.* 2017) for  
638 read mapping signatures consistent with structural mutations spanning *Sry* (see Methods). We  
639 uncovered no evidence for translocations or deletions encompassing the *Sry* locus in any CC  
640 strains. However, unexpectedly, we find that nearly all strains with the NOD/ShiLtJ Y  
641 chromosome carry a ~200kb duplication spanning the complete *Sry* coding region (**Figure S8**).  
642 CC003/UncJ is a single, notable exception: despite carrying a NOD/ShiLtJ Y chromosome, *Sry*  
643 is present as a single copy gene. Invoking parsimony, we conclude that a deletion of the  
644 duplicate *Sry* copy likely occurred during inbreeding of CC003/UncJ. A recent analysis of SNP  
645 array data in diverse mice identified a larger, 2.9 Mb *Sry*-spanning duplication in C3H/HeJ mice  
646 (Sigmon *et al.* 2020). The discovery of two independent *Sry*-spanning duplications in the  
647 classical inbred strains and a putative *de novo* deletion in CC003/UncJ suggests that this locus  
648 is inherently predisposed to recurrent genomic rearrangements and motivates further  
649 investigation into structural genetic diversity at this critical developmental regulator in house  
650 mice.

651

652 SRY activates the transcription of a second gene, *Sox9*, which in turn induces the testis  
653 developmental program. Duplication (deletion) of *Sox9* and/or its upstream regulatory elements  
654 can lead to constitutively high (low) levels of *Sox9* expression, providing a second mechanism  
655 for sex reversal in mammals (Foster *et al.* 1994; Gonen *et al.* 2018). Interestingly, while we find  
656 no evidence for duplication of *Sox9* itself, we observe a ~1kb duplication and a ~2kb deletion  
657 within the distal upstream *Sox9* regulatory region that are specific to animals carrying the  
658 NOD/ShiLtJ haplotype in these regions (**Figure S9**). These structural mutations do not span any  
659 annotated regulatory elements in the mm10 reference genome, but it is tempting to speculate  
660 that one or both may function to maintain native *Sox9* expression levels in the face of potentially  
661 increased SRY dosage driven by the *Sry*-duplication present in this strain.

662

663 It is unlikely that the NOD/ShiLtJ-specific SVs documented here are associated with an  
664 appreciable rate of sex reversal. NOD/ShiLtJ has served as a prominent mouse model of  
665 autoimmune disorders for more than 40 years, with no cases of sex reversal documented in this  
666 strain or in crosses involving this strain (including the CC), to our knowledge. In addition, *Sry*  
667 duplications are relatively common in rodent systems, and are not generally associated with sex  
668 reversal (Nagamine 1994; Lundrigan and Tucker 1997; Bullejos *et al.* 1999). Finally, half of the  
669 sex-biased CC strains do not carry the NOD/ShiLtJ haplotype at either *Sox9* or *Sry* (**Table S14**),  
670 necessarily assigning causality of SRD to other mechanisms. In summary, although we find  
671 novel structural rearrangements spanning the *Sry* sex determination gene and within the  
672 putative regulatory region of its upstream signaling target, *Sox9* (**Figures S8 and S9**), these

673 mutations seem unlikely, at face-value, to induce high rates of sex reversal and contribute to the  
 674 widespread SRD in the CC population.  
 675

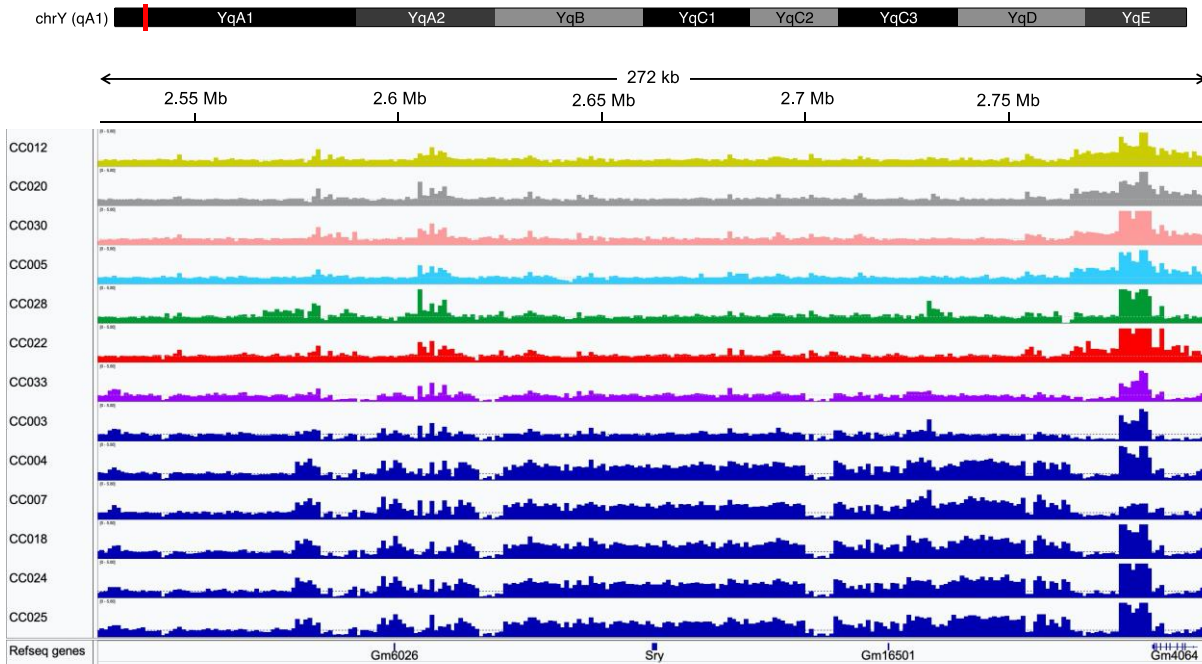

676  
 677  
 678 **Figure S8.** Estimated genomic copy number in 1kb windows across the *Sry* locus on the short  
 679 arm of chrY for a sample of CC lines. CC lines carrying the NOD/ShiLtJ Y chromosome are  
 680 depicted in dark blue. Other CC strains are color coded by the parental origin of their Y  
 681 chromosome: yellow (A/J), gray (C57BL/6J), pink (129S1/SvImJ), light blue (NZO/HILtJ), green  
 682 (CAST/EiJ), red (PWK/PhJ), and purple (WSB/EiJ) The faint horizontal dashed line on each plot  
 683 corresponds to the expected CN=1 state.

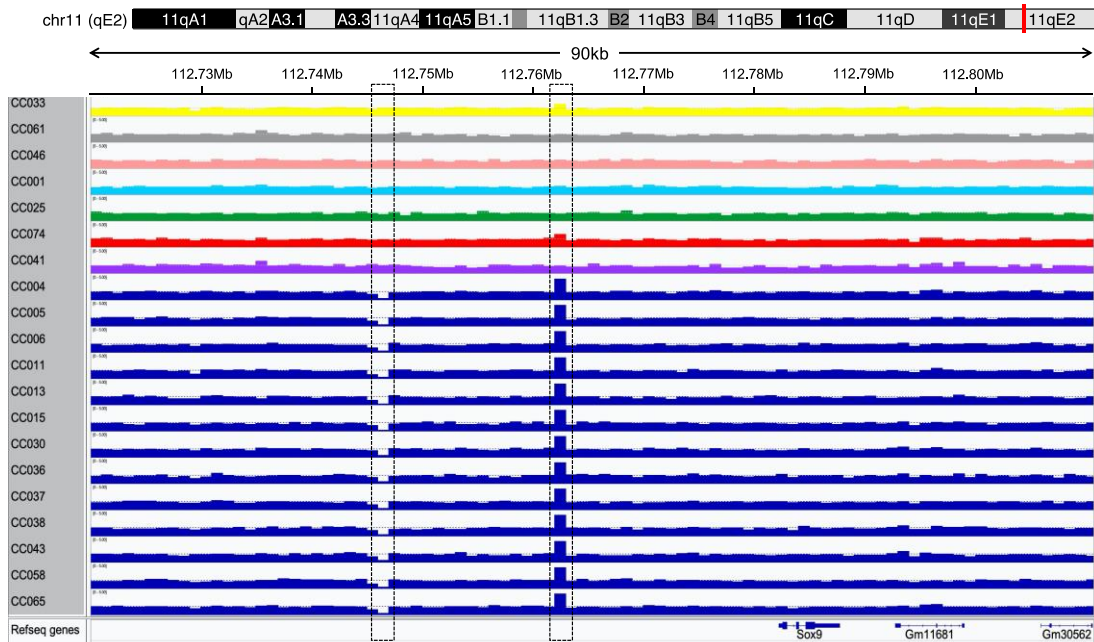

684

685 **Figure S9.** Estimated genomic copy number in 1kb windows across the *Sox9* locus on chr11 for  
686 a sample of CC lines. CC lines carrying the NOD/ShiLtJ haplotype at this locus are depicted in  
687 dark blue. Other CC strains are color coded by the parental origin of their chromosome: yellow  
688 (A/J), gray (C57BL/6J), pink (129S1/SvImJ), light blue (NZO/HILtJ), green (CAST/EiJ), red  
689 (PWK/PhJ), and purple (WSB/EiJ) The horizontal dashed line on each plot corresponds to the  
690 expected CN=2 state. Dashed black boxes highlight a small deletion and duplication in the *Sox9*  
691 distal upstream regulatory region that are specific to the NOD/ShiLtJ haplotype.  
692  
693

### 694 Genetic Conflict mediated by Sex-linked Ampliconic Genes May Drive Sex Ratio 695 Distortion in a Subset of CC Strains

696 The Y-linked ampliconic gene *Sly* and its X-linked counterparts, *Slx* and *Slx1*, are embroiled in  
697 a genetic conflict over sex chromosome transmission during post-meiotic spermatogenesis  
698 (Cocquet *et al.* 2012; Good 2012). Given that the CC founder strains include representatives  
699 from three cardinal house mouse subspecies differing in their absolute *Slx/Slx1* and *Sly* copy  
700 numbers (Morgan and Pardo-Manuel de Villena 2017), we hypothesized that *Slx/Slx1* - *Sly*  
701 mediated conflict may underlie the pervasive pattern of SRD in this mapping population.  
702

703 To address this possibility, we used publicly available whole genome sequences to estimate the  
704 relative genomic copy number of these ampliconic genes in each realized CC strain (**Table S15**;  
705 (Srivastava *et al.* 2017; Shorter *et al.* 2019b)). *Slx/Slx1* copy number varies approximately 2.5-  
706 fold across strains (range: 24-64 copies), with only 5 strains exhibiting estimated haploid copy  
707 number states that fall outside the range delimited by the parental genomes (parental range: 28-  
708 60 haploid copies; **Figure S10A**). Across the CC population, *Sly* copy number ranges from 54-  
709 168. CC founder whole genome sequences were generated from female samples, barring  
710 comparisons of *Sly* copy number status in the parental inbred and realized CC strains.  
711

A

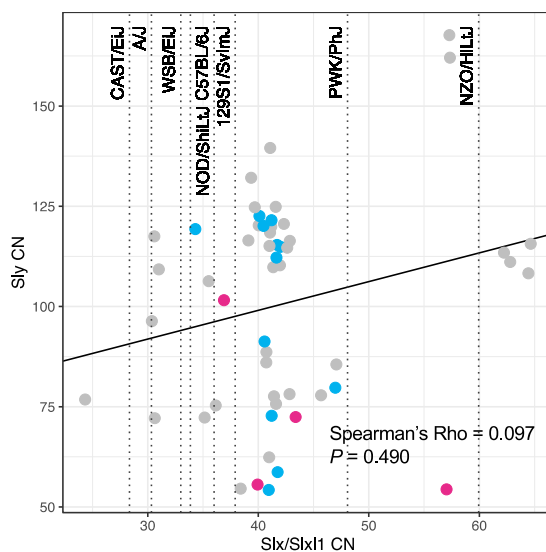

B

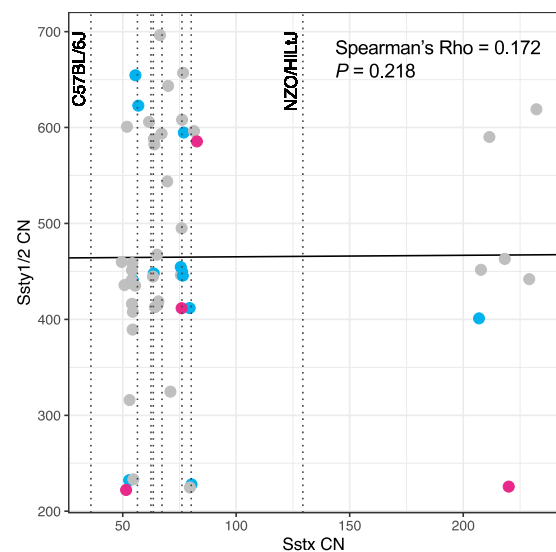

712

713 **Figure S10.** (A) *Slx/Slx1* and *Sly* copy number estimates for the CC strains. Vertical dashed  
714 lines denote estimated *Slx/Slx1* copy numbers for each of the 8 CC founder strains. The solid  
715 black line is the least squares trend line fit to the data. (B) *Sstx* and *Ssty1/2* copy number  
716 estimates for the sequenced CC strains. As in (A), vertical dashed lines indicate the estimated

717 *Sstx* copy number state of the inbred CC founder strains and the solid black line is an overall  
718 trend line fit to the data using the method of least squares. Strains with significantly male- and  
719 female-biased sex ratios are color-coded blue and red, respectively.

720

721 Overall, we find no correlation between the fraction of females at wean and *Slx/Slx1:Sly* copy  
722 number ratio (Spearman's Rho = 0.0968,  $P = 0.490$ ; **Figure 5A**). We validated the genomic  
723 read-depth *Slx/Slx1:Sly* estimated copy number (CN) ratios using ddPCR assays in a  
724 representative subset of CC strains (**Table S16**). There is excellent qualitative alignment  
725 between these two orthogonal methods for copy number estimation (**Figure 5B**; Spearman's  
726 Rho = 0.943,  $P = 0.0167$ ), suggesting that the absence of a relationship between the  
727 *Slx/Slx1:Sly* ratio and SRD is unlikely due to technical errors.

728

729 *Slx* and *Slx1* are both neo-functionalized copies of SYCP3, but have rapidly diverged from each  
730 other, exhibiting just 61% protein identity (Kruger *et al.* 2019). Recent experimental work  
731 suggests that drive potential may be restricted to *Slx1*: knockout of *Slx1*, but not *Slx*, is  
732 associated with a shift toward male-biased litters (Kruger *et al.* 2019). We find that the estimated  
733 copy number of *Slx1*, but not *Slx*, is positively correlated with SRD in the CC (*Slx1*:  
734 Spearman's Rho: 0.334,  $P = 0.0146$ ; *Slx*: Spearman's Rho = 0.227,  $P = 0.102$ ). However, the  
735 ratio of *Slx1:Sly* copy number carries no predictive association with SRD in this mapping  
736 population (Spearman's Rho = 0.105,  $P = 0.455$ ), in contrast to expectations.

737

738 Despite the lack of an overall association between the *Slx/Slx1:Sly* copy number ratio and sex  
739 ratio distortion across CC strains, many sex biased strains do exhibit extreme amplicon copy  
740 number ratios. In particular, CC006/TauUncJ has a relative excess of *Sly* copies relative to  
741 *Slx/Slx1*, consistent with the male bias in this strain. CC065/UncJ and CC058/UncJ, two  
742 female-biased strains, exhibit a relative excess of *Slx/Slx1* compared to *Sly*, consistent with the  
743 over-transmission of the X chromosome. However, there are clear exceptions to expected  
744 trends. CC013/GeniUncJ has a moderately low *Slx/Slx1:Sly* ratio, yet this strain is female-  
745 biased. CC002/UncJ and CC028/GeniUncJ have high *Slx/Slx1:Sly* ratios, in contrast to  
746 predictions given the male sex bias observed in these strains (**Figure 5A**).

747

748 Recent molecular evidence suggests that SLX/SLXL1 and SLY compete for binding to SSTY1/2  
749 and SPIN1, members of the spindlin gene family, to regulate expression at a large number of  
750 genes expressed during spermatogenesis (Comptour *et al.* 2014; Kruger *et al.* 2019; Moretti *et al.*  
751 *et al.* 2020). SLY binding to SSTY1/2 or SPIN1 at gene promoters triggers the recruitment of the  
752 SMRT/Ncor complex, repressing gene expression. In contrast, SLX and SLXL1 do not interact  
753 with the SMRT/Ncor complex, and their association with SSTY1/2 at gene promoters leads to  
754 the upregulation of target genes (Moretti *et al.* 2020). *Ssty1/2* are Y-linked ampliconic genes,  
755 whereas the mouse X-chromosome harbors several *Spin1* gene clusters. The antagonistic  
756 interactions of *Ssty/Spin1* with *Slx/Slx1* and *Sly* prompted us to explore whether copy number  
757 status at spindlin genes may factor into the complexity of SRD in the CC.

758

759 *Spin1* and *Ssty1/2* copy numbers span a 4.6- and 3.14-fold range in the CC population,  
760 respectively (*Spin1* range: 50-232 copies; *Ssty1/2* range: 223-698 copies; **Figure S10B**). We  
761 observe no significant relationship between the combined *Spin1* and *Ssty1/2* copy number and  
762 sex ratio (**Figure 5C**; Spearman's Rho = -0.178,  $P = 0.203$ ). Based on the known interactions  
763 between spindlins and members of the *Sycp3*-like family, we reasoned that the ratios of  
764 *Slx/Slx1* to spindlin CN and *Sly* to spindlin CN might be correlated with the degree of SRD.  
765 These predictions are not upheld (Spearman rank correlation  $P > 0.05$ ; **Figure S11**).

766

767 Overall, our findings uncover no global relationship between the copy number state of genes in  
768 the *Sycp3*-like and spindlin gene families with SRD in the CC. However, the copy number state  
769 of several CC lines accords with expectations under current models of SLX/SLXL1-SLY genetic  
770 conflict, and we speculate that this established drive system may contribute to SRD in an  
771 appreciable number of CC strains. Further, our genomic estimates of copy number for these  
772 ampliconic genes may not accurately estimate the number of transcriptionally active genes in  
773 each family. It is possible that a more widespread relationship between the copy number state  
774 of these ampliconic genes and SRD is concealed by the inclusion of large numbers of non-  
775 expressed pseudogenes in our copy number tallies. Lastly, we cannot rule out the likely  
776 possibility that complex protein interactions between SLX/SLX1, SLY, spindlins and potentially  
777 other ampliconic spermatid-expressed gene families contribute to the SRD documented in the  
778 CC (Kruger *et al.* 2019; Moretti *et al.* 2020).  
779

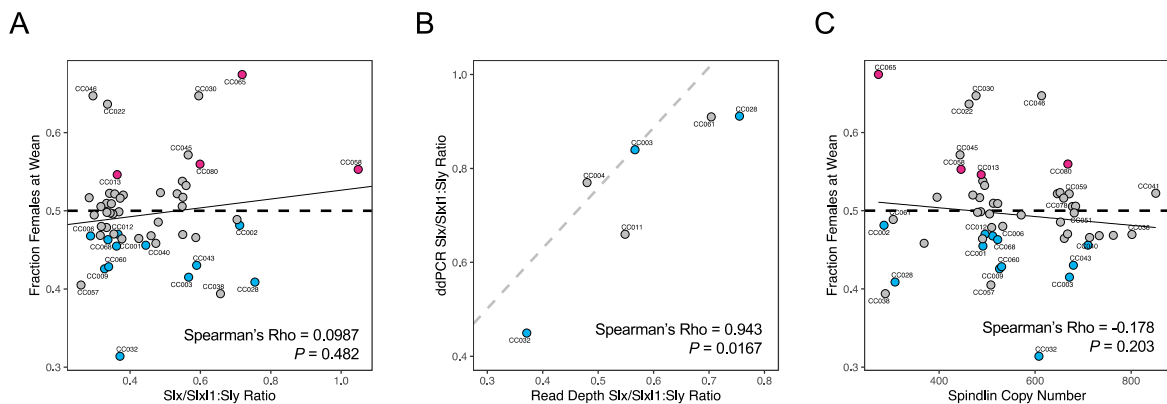

780  
781  
782  
783  
784  
785  
786  
787  
788  
789

**Figure 5.** Relationship between copy number at ampliconic sex-linked genes and SRD. (A) Correlation between the fraction of females at wean and the ratio of Slx/Slx1:Slly gene copy number. (B) Estimated copy numbers from genomic read depth and ddPCR are positively correlated for members of the SYCP3-like gene family. (C) Correlation between the fraction of females at wean and the copy number ratio of X:Y-linked genes in the spindlin gene family (*Sstx*, *Ssty1/2*). Points corresponding to strains with significantly male- and female-biased sex ratios are color-coded blue and red, respectively.



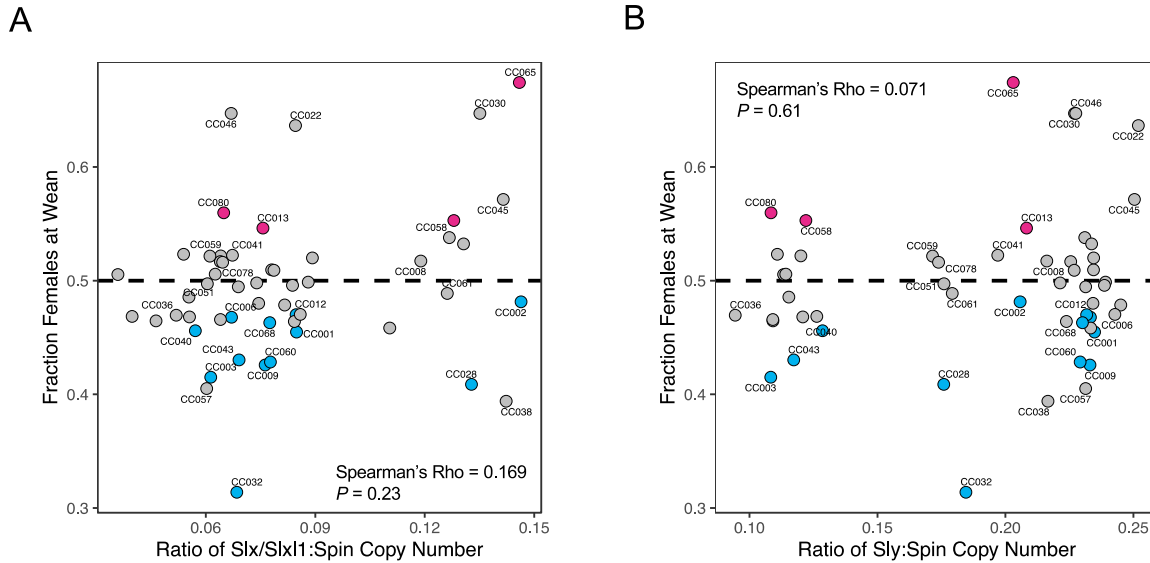

790  
791  
792  
793  
794  
795  
796

**Figure S11.** (A) Relationship between the ratio of *Slx/Slx11* and spindlin copy numbers and SRD and (B) the relationship between *Sly* and spindlin copy number and the fraction of females at wean in the CC panel. Points corresponding to significantly sex-biased strains are color-coded (blue = male-biased; red = female-biased). Horizontal dashed black line corresponds to a balanced sex ratio of 0.5.

797  
798

### Many sex-biased CC strains exhibit reduced male fertility

799  
800 SRD is frequently associated with reduced fertility in experimental crosses (Phadnis and Orr  
801 2009; Cocquet *et al.* 2010; Meiklejohn *et al.* 2018; Zanders and Unckless 2019; Kruger *et al.*  
802 2019), a trend that may emerge from the differential death, motility, or fertilization capacity of  
803 sperm bearing one sex chromosome relative to the other. It is widely acknowledged that many  
804 CC lines are poor breeders, and it appears that in most cases, reproductive output is  
805 constrained by male fertility (Shorter *et al.* 2017). While there is no significant relationship  
806 between average litter size and SRD among CC strains (**Figure 3A**), we sought to assess the  
807 relationship between SRD and more precise measures of male fertility.

808

809 We accessed publicly available reproductive phenotype datasets for several CC strains from the  
810 Mouse Phenome Database (Bogue *et al.* 2018; **Table S6**). Although the limited number of  
811 phenotyped CC strains effectively bars a rigorous statistical analysis, many sex-biased strains  
812 do appear to have reduced fertility relative to sex-balanced strains. Sex-biased CC strains tend  
813 to have lower testis weights than non-sex-biased CC strains, although this association is not  
814 statistically significant (**Figure 6A**; Spearman's Rho = -0.382, P = 0.248). Similarly, despite the  
815 lack of significant population-wide statistical correlations, several sex-biased strains - including  
816 CC028/GeniUncJ, CC032/GeniUncJ, and CC040/TauUncJ - exhibit low fractions of motile  
817 sperm and low sperm density compared to strains that yield sex-balanced litters (**Figure 6B,C**).  
818 We conclude that many sex-biased strains exhibit phenotypic signatures of reduced male  
819 fertility.

820

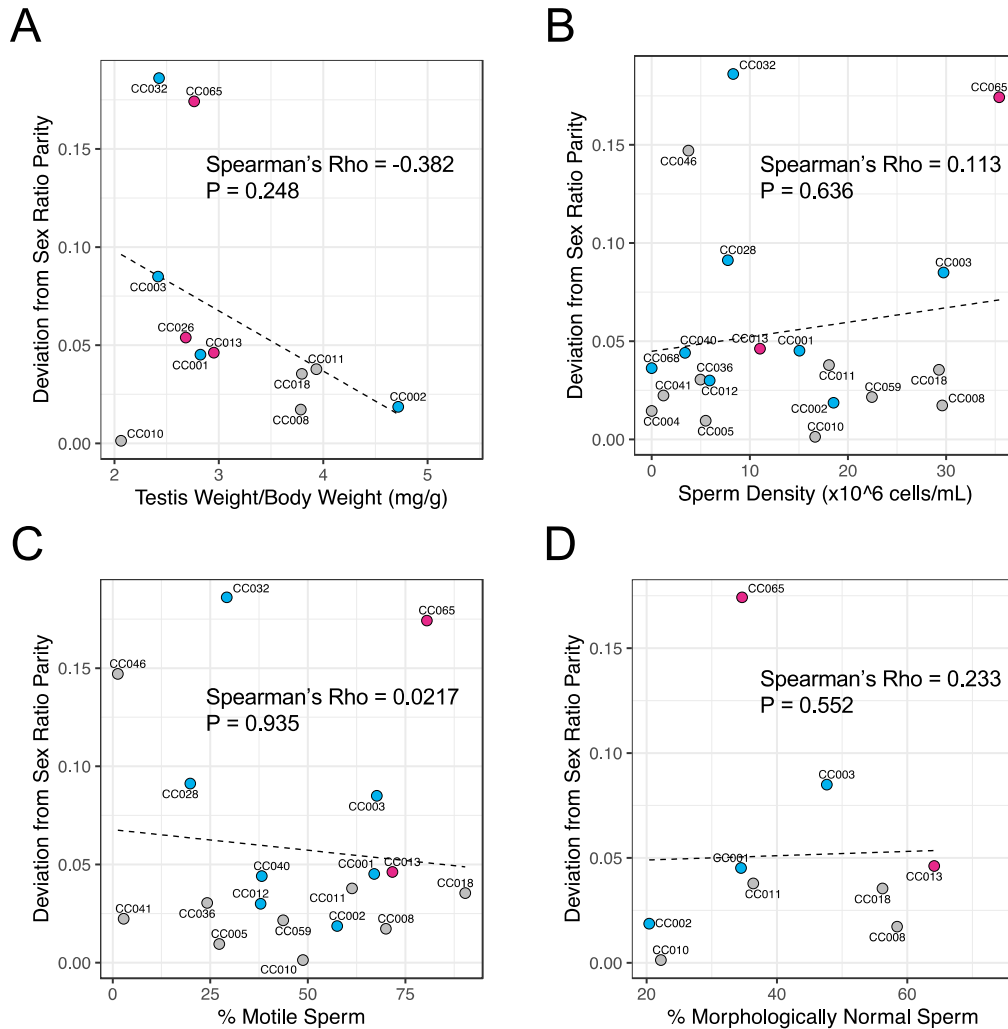

821  
822 **Figure 6.** Correlations between the magnitude of sex ratio distortion and (A) testis weight  
823 standardized by body weight, (B) sperm density, (C) percentage of motile sperm, and (D)  
824 the percentage of morphologically normal sperm. Dashed black lines trend lines were derived from  
825 simple linear regression ( $y \sim x$ ).  
826

### 827 Mechanisms of SRD in CC032/GeniUncJ

828 CC032/GeniUncJ (hereafter, CC032) is the most extremely sex-biased CC strain, with only one  
829 female out of every ~3 weaned pups. To our knowledge, SRD in this strain represents the  
830 strongest reported departure from Mendelian expectations in a mammal. Our analyses of strain  
831 breeding records indicate that SRD in CC032 cannot be entirely mediated by sex differences in  
832 survival. CC032 has moderately-sized litters (4.2 pups/litter; 73<sup>rd</sup> percentile among CC strains)  
833 and intermediate rates of neonatal mortality (20.6% mortality from birth to wean; 42<sup>nd</sup> percentile  
834 among CC strains). Remarkably, even if all live-born CC032 pups that did not survive to wean  
835 were female, this strain would still be significantly male-biased (**Table S2**; Binomial test  $P =$   
836 0.002565).  
837

838 Relative to other CC lines, CC032 males have low average testis weights (**Figure 6A**), low  
839 sperm density (**Figure 6B**), and reduced motility (**Figure 6C**). Histological analysis of testis  
840 cross-sections reveal that CC032 males also have smaller seminiferous tubules than the

841 majority of the CC founder strains (**Figure 7A**) and a higher fraction of tubules with vacuoles,  
 842 (**Figures 7B-D**).

843

844 Based on these phenotypic findings, we reasoned that targeted killing of X-bearing germ cells  
 845 could be a plausible explanation for the observed male bias in CC032. We used whole  
 846 chromosome painting to assess sex chromosome representation in mature sperm from this  
 847 strain. We observe equal numbers of X- and Y-bearing sperm (49.7% chrX-bearing sperm;  
 848 Binomial  $P = 0.854$ ; **Figures 7E** and **7F**), dismissing this explanation for SRD.  
 849

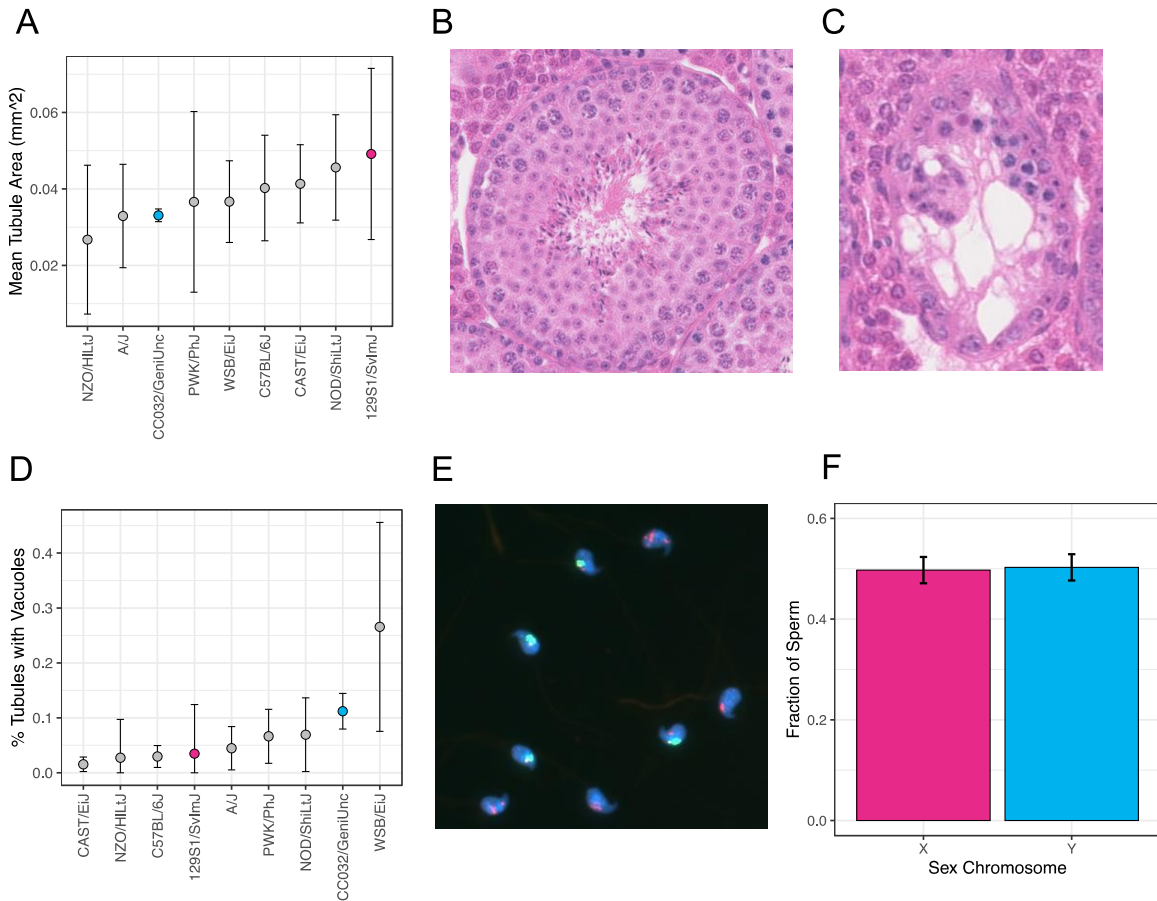

850 **Figure 7.** Reproductive phenotypes in CC032/GeniUncJ and the 8 CC founder strains. (A)  
 851 Mean tubule area in mm<sup>2</sup> (+/- 1 standard deviation). (B) Representative stage VII/VIII tubule  
 852 cross section from CC032. (C) CC032 harbors a high fraction of tubules with large vacuoles. (D)  
 853 Percentage of tubules with vacuoles (+/- 1 standard deviation) for each of the 8 CC founders  
 854 and CC032. (E) Representative image of CC032 sperm hybridized with fluorescent paint probes  
 855 against chrY (green) and chrX (red). Y-bearing sperm carry a slight signal from chrX due to  
 856 shared X/Y homology across the pseudoautosomal region. (F) Fraction of X- and Y-bearing  
 857 sperm in CC032 from X and Y chromosome painting.  
 858

859

860

861 CC032 harbors a PWK Y-chromosome with a high *Sly* copy number and an X chromosome  
 862 bearing contributions from laboratory strains with *M. m. domesticus* ancestry (e.g., moderate  
 863 *Slx/Slx1* copy number). As a consequence of this sex chromosome haplotype structure, the

864 ratio of *Slx/Slx1* to *Sly* in CC032 is lower than the CC-wide average (**Figure 5A**). The observed  
 865 *Slx/Slx1:Sly* ratio in this strain is consistent with the observed male-bias. However, the strength  
 866 of SRD in CC032 exceeds that observed in both *Slx/Slx1* knockdown and knockout mice  
 867 (Cocquet *et al.* 2010; Kruger *et al.* 2019), suggesting the complementary action of other  
 868 mechanisms that exacerbate SRD on this genetic background.

869  
 870 We scanned the genome of CC032 for potential structural mutations in other sex-linked  
 871 ampliconic genes that could, conceivably, amplify the strength of *Slx/Slx1:Sly*-mediated SRD.  
 872 Strikingly, the CC032 genome shows a pronounced enrichment of reads mapping to chrXA.1  
 873 (chrX:3-6Mb; **Figure S12**) and chrXqA3 (chrX:30.5-35.5 Mb; **Figure 8**). These loci harbor  
 874 clusters of *Spin1* and *Spin2*, both members of the spindlin gene family, as well as a large  
 875 number of genes in the *Btd35f* family. These regions encompass several gaps on the mm10  
 876 mouse reference assembly and are present at variable copy number across the 8 CC founder  
 877 strains. However, the read depth profile of CC032 at these loci exceeds what is observed in any  
 878 of the 8 founder strains (**Figure 8**; **Figure S12**). Several other CC lines exhibit similar read  
 879 depth patterns across these two X-linked loci, but intriguingly, the strain haplotype origin of  
 880 these amplified regions is variable (**Figure 8**). CC032 harbors C57BL/6J ancestry across both  
 881 regions, but strains with 129S1/SvImJ, NOD/ShiLtJ, and PWK/PhJ-derived haplotypes exhibit  
 882 near identical read-depth signatures (**Figure 8**; **Figure S12**). This observation would seem to  
 883 rule out a single common founder effect and imply an incredible rate of structural instability at  
 884 these loci. However, due to the complex, ampliconic architecture of these loci, we cannot  
 885 definitively rule out the possibility that assembly, mapping, or genotyping errors have led to mis-  
 886 assignment of strain haplotypes in these regions. Long-read sequence data for CC strains may  
 887 help resolve the architectural complexity of this locus and close standing assembly gaps.  
 888

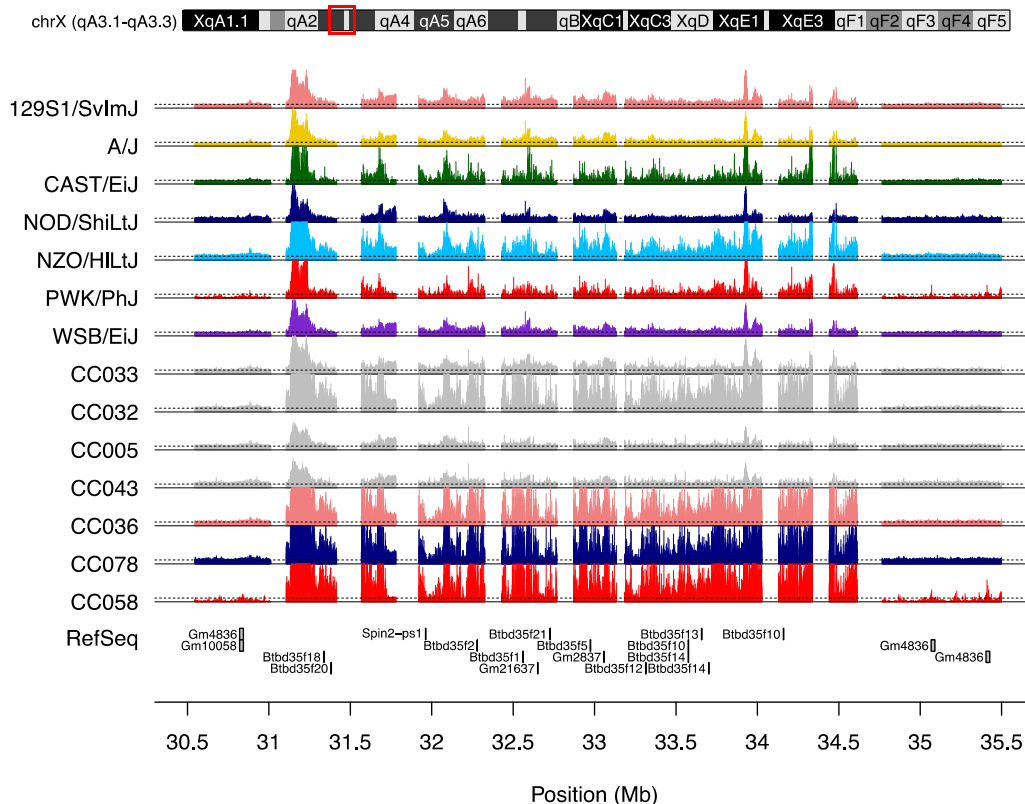

889

890 **Figure 8.** Estimated copy number state in the CC founder strains and 7 CC strains at chrX:30.5-  
891 35.5 Mb. Dotted black lines correspond to CN=1. Tracks are color-coded by strain ancestry  
892 (A/J: yellow, C57BL/6J: gray, 129S1/SvImJ: pink, NOD/ShiLtJ: dark blue, NZO/HILtJ: light blue,  
893 CAST/EiJ: green, PWK/PhJ: red, and WSB/EiJ: purple). Gaps in the read depth tracks  
894 correspond to gaps in the mm10 reference genome assembly. CN states exceeding 10 are  
895 clipped for visualization purposes.  
896  
897

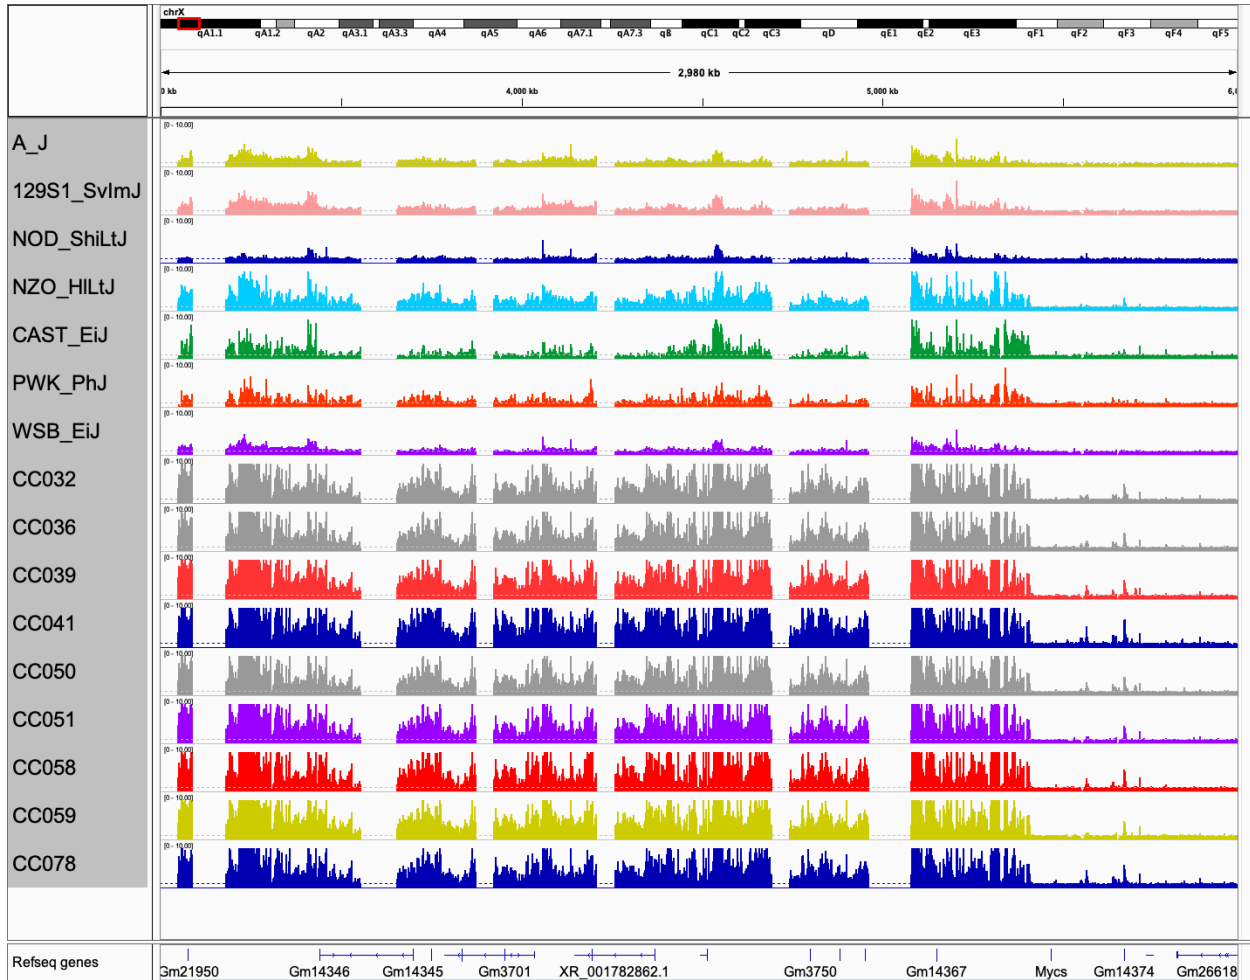

898 **Figure S12.** Estimated copy number state in the CC founder strains and 7 CC strains at chrX:3-  
899 6Mb. Dotted black lines correspond to CN=1. Tracks are color-coded by strain ancestry (A/J:  
900 yellow, C57BL/6J: gray, 129S1/SvImJ: pink, NOD/ShiLtJ: dark blue, NZO/HILtJ: light blue,  
901 CAST/EiJ: green, PWK/PhJ: red, and WSB/EiJ: purple). Gaps in the read depth tracks  
902 correspond to gaps in the mm10 reference genome assembly. CN states exceeding 10 are  
903 clipped for visualization purposes.  
904  
905  
906

907 Spindlins are chromatin readers that have been shown to directly bind to SLX and SLY  
908 (Comptour *et al.* 2014; Kruger *et al.* 2019), although the consequences of this molecular  
909 association are poorly understood. Very little is known about *Btbd35f* genes, but they are  
910 regulated by SLX/SLXL1- and SLY in spermatids (Moretti *et al.* 2020). Our findings raise the  
911 intriguing possibility that the extreme SRD in CC032 is mediated by a complex interplay  
912 involving multiple sex-linked ampliconic gene families. However, further work is needed to

913 unravel the potential contributions of spindlins and *Btbd35f* to the dynamic chromatin  
914 remodeling during post-meiotic spermatogenesis, and uncover how relative copy number  
915 changes at these sex-linked ampliconic genes interface with mechanisms of *Slx/Slx*-mediated  
916 SRD.

917

### 918 **Sex Ratio Distortion in the Diversity Outbred Mouse Population**

919 The Diversity Outbred (DO) population is a heterogeneous stock developed by outbreeding  
920 early generation CC mice from distinct inbreeding funnels (Svenson *et al.* 2012). The population  
921 is maintained as 175 outbred families defined by matrilineal inheritance. At every generation, a  
922 female from family *A* is mated to a male from a randomly selected family *B*. Their progeny  
923 comprise the next generation of DO lineage *A*. As a consequence of this breeding structure, DO  
924 mice from a given family are more closely related than DO animals from different families. Thus,  
925 if SRD has a genetic basis, males and females from individual DO lineages may sire an excess  
926 of males or females relative to Mendelian expectations.

927

928 We used published DO breeding records to test for significant SRD in males and females from  
929 each of the 175 DO families (**Table S10**; Chesler *et al.* 2016). Females from 15 DO families  
930 have sex-biased litters (Binomial Test, uncorrected  $P < 0.05$ ), with 10 families trending toward  
931 an excess of males at wean (**Figure 9a**). Similarly, males from 12 DO lineages sire sex-biased  
932 litters, with all but three producing an excess of males (**Figure 9b**). For both DO males and  
933 females, the observed number of sex-biased families exceeds the ~9 families expected by  
934 chance. Sample sizes within each DO lineage are modest ( $n=67-286$ ; mean = 193), and we are  
935 underpowered to detect slight departures from the expected sex ratio. Nonetheless, our findings  
936 suggest that the 8-way genotypes associated with DO and CC mice are frequently associated  
937 with SRD in both heterozygous and inbred states.

938

939 Despite an excess of both female and male DO lineages with significant SRD, there is no  
940 correlation between the sex ratios of progeny sired by dams and sires from a given lineage  
941 (Spearman's  $Rho = -0.12$ ;  $P = 0.1094$ ; **Figure S13**). Indeed, there are no cases where DO  
942 males and DO females from the same lineage both have sex-biased litters (**Figure S13**).  
943 Evidently, the biological mechanisms of SRD in the DO (and, potentially, the CC) are largely  
944 sex-limited in their manifestation. For instance, germline genetic conflict mediated by sex-linked  
945 selfish elements only manifest effects on sex ratios via males whereas maternal effects are only  
946 rendered through females.

947

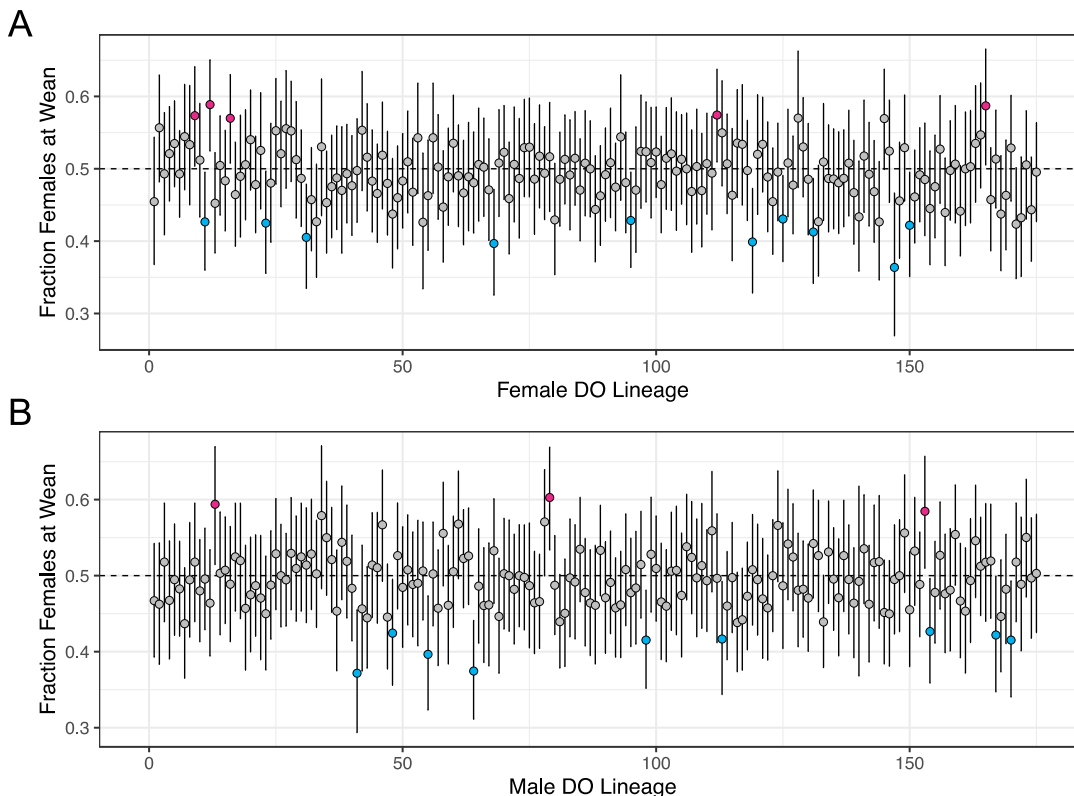

948  
949 **Figure 9.** Sex ratios of weaned litters sired by (A) females and (B) males from each DO  
950 breeding lineage. Lineages producing significantly male- and female-biased litters are color-  
951 coded blue and red, respectively. Error bars correspond to 95% confidence intervals calculated  
952 from the binomial distribution.  
953

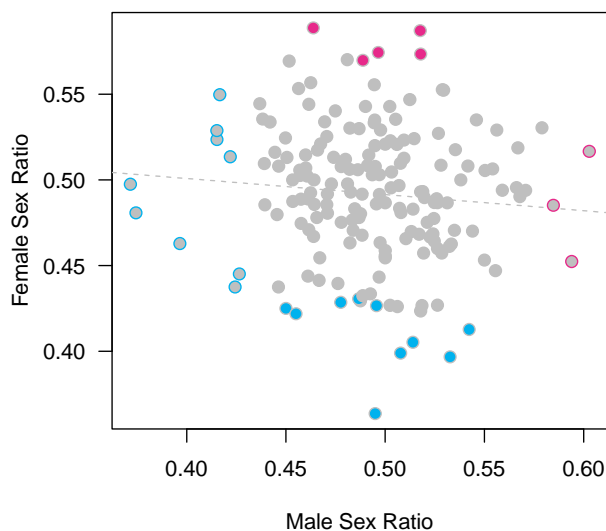

954  
955 **Figure S13.** Correlation between the sex ratio of litters sired by males and females from the  
956 same DO breeding lineage. The outline color of each point denotes the direction of any  
957 significant sex bias associated with male DO lineages. Conversely, the solid color of each point  
958 indicates the direction of significant sex bias associated with female lineages. No lineages

959 exhibit both male and female-associated sex bias. Blue: male bias; Red: female bias. Gray: no  
960 significant sex bias.



961 **DISCUSSION**

962

963 We have performed the first in-depth analysis of sex ratio distortion in the Collaborative Cross  
964 multiparent mouse mapping population. Our integrated analyses of colony breeding records,  
965 genome sequences, and phenotypic data uncover widespread SRD in the CC, with several  
966 strains exhibiting extreme departures from sex ratio parity. These findings expose the complex  
967 basis of sex ratio control, carry important implications for CC husbandry practices, and nominate  
968 the CC as powerful resource for studying genetic conflict in action.

969

970 We show that CC strain sex ratios are stable over time, consistent across different breeding  
971 facilities, and are not broadly dependent on maternal genotype or condition. However, we  
972 acknowledge that our analyses are underpowered to detect weak temporal or maternal effects  
973 on SRD. We are continuing to compile and analyze breeding records from the CC colony  
974 maintained at The Jackson Laboratory, and the addition of new data over time will increase  
975 statistical power and may allow detection of smaller effects. It is also critical to emphasize that  
976 our investigations are limited to mice reared under a common set of standard laboratory  
977 conditions. It remains possible that environmental perturbations or external stressors could  
978 induce CC population-wide or strain-specific skews from the sex ratios reported here. Future  
979 work is needed to explore the interaction of environmental variables with SRD in the CC.  
980 Nonetheless, under the common housing conditions analyzed here, it appears that genetic  
981 effects dominant other potential contributors to SRD in the CC population.

982

983 Multiple genetic mechanisms can give rise to SRD, including alleles that confer sex differences  
984 in embryonic or neonatal survival or genetic mutations that induce sex reversal. We find no  
985 consistent relationship between survival in early development and SRD in the CC. Similarly, our  
986 analyses of structural variation at key genes in the sex determination pathway rule out sex  
987 reversal as a likely explanation for the pervasive SRD in this mapping population. We also show  
988 via QTL mapping that there are no large effect single-locus modifiers of SRD segregating in the  
989 CC. These results, combined with the general absence of SRD in the inbred parental CC lines  
990 and their F1 hybrids (Shorter *et al.* 2019a), imply that the underlying genetic mechanisms of  
991 SRD are most likely attributable to multilocus combinations of alleles that are only revealed in  
992 the 8-way CC population.

993

994 These considerations lead us to speculate that the SRD in this population arises, at least in part,  
995 from the de-coupling of cryptic selfish sex-linked drive elements and their co-evolved  
996 suppressors. Several lines of evidence lend support to this hypothesis. First, such genetic  
997 conflicts necessary involve the interaction of multiple loci, aligning with the absence of SRD in  
998 the CC founder strains and the lack of any large, single-locus effects in our QTL mapping.  
999 Second, we observe minimal evidence for maternal effects and maternal genotype-dependence  
1000 on SRD, implying that SRD in the CC is most frequently determined by mechanisms rendered  
1001 through the male germline. Conflict between feuding drive elements on the X and Y  
1002 chromosomes is, by genetic necessity, limited in expression to males. Third, transmission  
1003 distorters typically act by disabling or killing non-carrier gametes, imposing a fitness cost to  
1004 carriers (Zanders and Unckless 2019). Many sex-biased CC strains are characterized by small  
1005 litter sizes (**Figure 3a**) and markers of reduced male fertility, including low testis weights,  
1006 reduced sperm density, and impaired sperm motility (**Figure 7**).

1007

1008 One compelling candidate system is the SYCP3-like family of ampliconic sex-linked  
1009 transmission distorters: *Slx* and *Slx1* on the X chromosome and their Y-linked paralog, *Sly*.  
1010 Prior work has demonstrated that genetic imbalance of SLX/SLXL1 and SLY leads to disruption  
1011 of the gene regulatory program in spermatids, sex ratio distortion, and infertility in house mice

1012 (Cocquet *et al.* 2009, 2012; Kruger *et al.* 2019). The 8 CC founder strains differ in their native  
1013 copy number status at these genes (Morgan and Pardo-Manuel de Villena 2017), and many  
1014 sex-biased CC lines have inherited a relative excess or deficit of *Slx/Slx1* gene copies relative  
1015 to *Sly*, consistent with their observed SRD.

1016  
1017 However, we do not find a simple, overall relationship between SRD and *Slx/Slx1:Sly* CN ratio  
1018 across this population and several strains with extreme *Slx/Slx1:Sly* ratios do not exhibit  
1019 expected patterns of SRD (**Figure 5A**). Some genomic copies of these genes may be non-  
1020 functional, and future work to quantify their mRNA or protein abundance in CC strains may help  
1021 clarify the presumed underlying relationship between the protein products of these ampliconic  
1022 genes and SRD. Beyond this possibility, recent work has begun to uncover the complexity of  
1023 *Slx/Slx1* and *Sly* mediated conflict, suggesting that a simple linear relationship between gene  
1024 copy number ratio and the magnitude of SRD is potentially overly simplistic. In particular,  
1025 *SLX/SLXL1* and *SLY* compete for binding to members of a second sex-linked amplicon gene  
1026 family – the spindlin proteins *SSTY1/2* and *SPIN1* (Kruger *et al.* 2019; Moretti *et al.* 2020) – to  
1027 antagonistically regulate large numbers of sex-linked and autosomal genes in post-meiotic  
1028 spermatids. It is noteworthy that many sex-biased CC strains also have extreme spindlin  
1029 genomic copy numbers (**Figure 5C**). Additionally, our focused investigations in  
1030 CC032/GeniUncJ reveal apparent *de novo* expansions at two spindlin gene clusters on chrX,  
1031 seemingly implicating these genes in the extreme SRD that characterizes this strain. We  
1032 speculate that spindlins, and potentially other sex-linked ampliconic genes, interact with  
1033 *Slx/Slx1* and *Sly* to modulate the strength of SRD in different CC strains. Future work to probe  
1034 patterns of differential gene regulation in round spermatids from strains with extreme SRD  
1035 versus those siring sex-balanced litters may help unlock the complex molecular mechanisms of  
1036 SRD in this population.

1037  
1038 Overall, the widespread trend of SRD across the CC and DO mouse populations seems to  
1039 suggest that the intersubspecific 8-way genotypes segregating in these populations unmask a  
1040 complex network of segregation distorters that are silenced in the context of individual inbred  
1041 strains. Here, we focused on sex ratio distortion, as phenotypic sex provides a faithful readout of  
1042 chromosome transmission (assuming no sex reversal). However, the high frequency of SRD  
1043 across these populations raises the parallel prospect that selfish elements on other  
1044 chromosomes could bias transmission in these 8-way diverse mouse populations. Indeed, a  
1045 segregation distorter on chr2qC3 was previously identified via routine genetic monitoring in the  
1046 DO population (Didion *et al.* 2015; Chesler *et al.* 2016). Specifically, the WSB/EiJ allele at this  
1047 locus exhibits preferential segregation to the maternal oocyte during asymmetric female meiosis  
1048 and threatened to drive to fixation, purging segregating variation at this locus from the DO.  
1049 Although the DO maintenance breeding program is designed to minimize the potential for drive  
1050 (Chesler *et al.* 2016), it is expected that, overtime, *de novo* evolution or the recombination of  
1051 existing drive elements onto permissible genetic backgrounds could allow transmission  
1052 distorters to take root.

1053  
1054 Our findings also carry practical implications for CC strain maintenance and experimental  
1055 design. Many CC strains exhibit only slight or no departure from Mendelian sex ratio  
1056 expectations, but several yield strongly sex-biased litters. CC065/UncJ and CC032/GeniUncJ  
1057 are the most notable examples, with just one male and one female in every three live-weaned  
1058 pups, respectively. Given the modest reproductive output of most CC lines, these aspects of  
1059 strain reproductive performance highlight the need for implementing strain-specific breeding  
1060 programs to maintain stable colonies. Such practices are already in place at The Jackson  
1061 Laboratory to ensure the long-term shelf-stability of this important diverse mouse resource, but  
1062 should also be embraced in the settings of individual laboratories. Importantly, these breeding

1063 challenges are not necessarily eliminated by outcrossing, as we document several CC-RIX  
1064 backgrounds with SRD (**Figure S6**) and observe an excess of sex-biased lineages in the  
1065 Diversity Outbred mapping population (**Figure 9**).

1066  
1067 The CC population is an established resource for complex trait mapping and systems genetics  
1068 investigation, and has yielded powerful new mouse models of human disease (Churchill *et al.*  
1069 2004; Aylor *et al.* 2011; Philip *et al.* 2011; Rogala *et al.* 2014; Srivastava *et al.* 2017; Green *et*  
1070 *al.* 2017). At the same time, the CC panel represents a pedigreed, well-resourced population  
1071 optimally suited for investigations into the fundamental properties of genetic inheritance,  
1072 including chromosome transmission. Each realized CC line harbors a unique multilocus  
1073 combination of haplotypes from three cardinal house mouse subspecies, providing a real-time  
1074 window into how intersubspecific allele permutations shape genome function and evolution. Our  
1075 work has spotlighted the CC as a uniquely powerful platform for studying intragenomic genetic  
1076 conflict and SRD in house mice and lays the groundwork for future investigations into the  
1077 molecular basis of this important biological phenomenon.

1078  
1079

#### 1080 **ACKNOWLEDGEMENTS**

1081 We gratefully acknowledge the contribution of the Histopathology and Microscopy Scientific  
1082 Services at The Jackson Laboratory for expert assistance with the work described in this  
1083 publication. We are also indebted to Racheal Wallace for conserving cage cards from all  
1084 Collaborative Cross mating units, enabling us to compile comprehensive breeding records from  
1085 this mouse population. We thank Candice Baker and Cat Lutz for sharing breeding data from  
1086 CC-RIX crosses. This work was funded by a NIGMS MIRA (R35GM133415) awarded to BLD.  
1087 FB was supported by a Research Experience for Undergraduate Site Award (DBI-1262049; PI:  
1088 Bob Braun).

1089 **REFERENCES**

- 1090
- 1091 Aylor D. L., W. Valdar, W. Foulds-Mathes, R. J. Buus, R. A. Verdugo, *et al.*, 2011 Genetic  
1092 analysis of complex traits in the emerging Collaborative Cross. *Genome Res.* 21: 1213–  
1093 1222. <https://doi.org/10.1101/gr.111310.110>
- 1094 Bogue M. A., S. C. Grubb, D. O. Walton, V. M. Philip, G. Kolishovski, *et al.*, 2018 Mouse  
1095 Phenome Database: an integrative database and analysis suite for curated empirical  
1096 phenotype data from laboratory mice. *Nucleic Acids Research* 46: D843–D850.  
1097 <https://doi.org/10.1093/nar/gkx1082>
- 1098 Bogue M. A., V. M. Philip, D. O. Walton, S. C. Grubb, M. H. Dunn, *et al.*, 2020 Mouse Phenome  
1099 Database: a data repository and analysis suite for curated primary mouse phenotype  
1100 data. *Nucleic Acids Res* 48: D716–D723. <https://doi.org/10.1093/nar/gkz1032>
- 1101 Bravo Núñez M. A., N. L. Nuckolls, and S. E. Zanders, 2018 Genetic Villains: Killer Meiotic  
1102 Drivers. *Trends in Genetics* 34: 424–433. <https://doi.org/10.1016/j.tig.2018.02.003>
- 1103 Broman K. W., D. M. Gatti, P. Simecek, N. A. Furlotte, P. Prins, *et al.*, 2019 R/qt12: Software for  
1104 Mapping Quantitative Trait Loci with High-Dimensional Data and Multiparent  
1105 Populations. *Genetics* 211: 495–502. <https://doi.org/10.1534/genetics.118.301595>
- 1106 Bullejos M., A. Sánchez, M. Burgos, R. Jiménez, and R. Díaz De La Guardia, 1999 Multiple  
1107 mono- and polymorphic Y-linked copies of the SRY HMG-box in microtidae. *Cytogenet  
1108 Cell Genet* 86: 46–50. <https://doi.org/10.1159/000015428>
- 1109 Chen X., O. Schulz-Trieglaff, R. Shaw, B. Barnes, F. Schlesinger, *et al.*, 2016 Manta: rapid  
1110 detection of structural variants and indels for germline and cancer sequencing  
1111 applications. *Bioinformatics* 32: 1220–1222.  
1112 <https://doi.org/10.1093/bioinformatics/btv710>
- 1113 Chen S., Y. Zhou, Y. Chen, and J. Gu, 2018 fastp: an ultra-fast all-in-one FASTQ preprocessor.  
1114 *Bioinformatics* 34: i884–i890. <https://doi.org/10.1093/bioinformatics/bty560>
- 1115 Chesler E. J., D. M. Gatti, A. P. Morgan, M. Strobel, L. Trepanier, *et al.*, 2016 Diversity Outbred  
1116 Mice at 21: Maintaining Allelic Variation in the Face of Selection. *G3:  
1117 Genes|Genomes|Genetics* 6: 3893.
- 1118 Churchill G. A., D. C. Airey, H. Allayee, J. M. Angel, A. D. Attie, *et al.*, 2004 The Collaborative  
1119 Cross, a community resource for the genetic analysis of complex traits. *Nat Genet* 36:  
1120 1133–7. <https://doi.org/10.1038/ng1104-1133>
- 1121 Cocquet J., P. J. I. Ellis, Y. Yamauchi, S. K. Mahadevaiah, N. A. Affara, *et al.*, 2009 The  
1122 Multicopy Gene Sly Represses the Sex Chromosomes in the Male Mouse Germline after  
1123 Meiosis. *PLOS Biology* 7: e1000244. <https://doi.org/10.1371/journal.pbio.1000244>
- 1124 Cocquet J., P. J. I. Ellis, Y. Yamauchi, J. M. Riel, T. P. S. Karacs, *et al.*, 2010 Deficiency in the  
1125 Multicopy Sycp3-Like X-Linked Genes Slx and Slx1 Causes Major Defects in Spermatid  
1126 Differentiation. *MBoC* 21: 3497–3505. <https://doi.org/10.1091/mbc.e10-07-0601>

- 1127 Cocquet J., P. J. I. Ellis, S. K. Mahadevaiah, N. A. Affara, D. Vaiman, *et al.*, 2012 A Genetic  
1128 Basis for a Postmeiotic X Versus Y Chromosome Intragenomic Conflict in the Mouse.  
1129 PLOS Genetics 8: e1002900. <https://doi.org/10.1371/journal.pgen.1002900>
- 1130 Comptour A., C. Moretti, M.-E. Serrentino, J. Auer, C. Ialy-Radio, *et al.*, 2014 SSTY proteins co-  
1131 localize with the post-meiotic sex chromatin and interact with regulators of its  
1132 expression. FEBS J 281: 1571–1584. <https://doi.org/10.1111/febs.12724>
- 1133 Conway S. J., S. K. Mahadevaiah, S. M. Darling, B. Capel, A. M. Rattigan, *et al.*, 1994 Y353/B:  
1134 a candidate multiple-copy spermiogenesis gene on the mouse Y chromosome.  
1135 Mammalian Genome 5: 203–210. <https://doi.org/10.1007/BF00360546>
- 1136 Courret C., C.-H. Chang, K. H.-C. Wei, C. Montchamp-Moreau, and A. M. Larracunte, 2019  
1137 Meiotic drive mechanisms: lessons from Drosophila. Proceedings of the Royal Society  
1138 B: Biological Sciences 286: 20191430. <https://doi.org/10.1098/rspb.2019.1430>
- 1139 Dermitzakis E. T., J. P. Masly, H. M. Waldrip, and A. G. Clark, 2000 Non-Mendelian  
1140 Segregation of Sex Chromosomes in Heterospecific Drosophila Males. Genetics 154:  
1141 687–694. <https://doi.org/10.1093/genetics/154.2.687>
- 1142 Didion J. P., A. P. Morgan, A. M.-F. Clayshulte, R. C. McMullan, L. Yadgary, *et al.*, 2015 A Multi-  
1143 Megabase Copy Number Gain Causes Maternal Transmission Ratio Distortion on  
1144 Mouse Chromosome 2. PLOS Genetics 11: e1004850.  
1145 <https://doi.org/10.1371/journal.pgen.1004850>
- 1146 Douhard M., 2017 Offspring sex ratio in mammals and the Trivers-Willard hypothesis: In pursuit  
1147 of unambiguous evidence. BioEssays 39: 1700043.  
1148 <https://doi.org/10.1002/bies.201700043>
- 1149 Drickamer L. C., 1990 Seasonal variation in fertility, fecundity and litter sex ratio in laboratory  
1150 and wild stocks of house mice (*Mus domesticus*). Lab Anim Sci 40: 284–288.
- 1151 Dumont B. L., 2017 Meiotic Consequences of Genetic Divergence Across the Murine  
1152 Pseudoautosomal Region. Genetics 205: 1089–1100.  
1153 <https://doi.org/10.1534/genetics.116.189092>
- 1154 Ellegren H., 2009 The different levels of genetic diversity in sex chromosomes and autosomes.  
1155 Trends in Genetics 25: 278–284. <https://doi.org/10.1016/j.tig.2009.04.005>
- 1156 Foster J. W., M. A. Dominguez-Steglich, S. Guioli, C. Kwok, P. A. Weller, *et al.*, 1994  
1157 Campomelic dysplasia and autosomal sex reversal caused by mutations in an SRY-  
1158 related gene. Nature 372: 525–530. <https://doi.org/10.1038/372525a0>
- 1159 Gonen N., C. R. Futtner, S. Wood, S. A. Garcia-Moreno, I. M. Salamone, *et al.*, 2018 Sex  
1160 reversal following deletion of a single distal enhancer of Sox9. Science 360: 1469–1473.  
1161 <https://doi.org/10.1126/science.aas9408>
- 1162 Good J. M., T. Giger, M. D. Dean, and M. W. Nachman, 2010 Widespread Over-Expression of  
1163 the X Chromosome in Sterile F1 Hybrid Mice. PLOS Genetics 6: e1001148.  
1164 <https://doi.org/10.1371/journal.pgen.1001148>

- 1165 Good J. M., 2012 The Conflict within and the Escalating War between the Sex Chromosomes.  
1166 PLoS Genet 8. <https://doi.org/10.1371/journal.pgen.1002955>
- 1167 Goodfellow P. N., and R. Lovell-Badge, SRY and Sex Determination in Mammals. Annual  
1168 Review of Genetics 27: 71–92.
- 1169 Green R., C. Wilkins, S. Thomas, A. Sekine, D. M. Hendrick, *et al.*, 2017 Oas1b-dependent  
1170 Immune Transcriptional Profiles of West Nile Virus Infection in the Collaborative Cross.  
1171 G3: Genes, Genomes, Genetics 7: 1665–1682. <https://doi.org/10.1534/g3.117.041624>
- 1172 Hamilton W. D., 1967 Extraordinary Sex Ratios. Science 156: 477–488.  
1173 <https://doi.org/10.1126/science.156.3774.477>
- 1174 Helle S., T. Laaksonen, A. Adamsson, J. Paranko, and O. Huitu, 2008 Female field voles with  
1175 high testosterone and glucose levels produce male-biased litters. Animal Behaviour 75:  
1176 1031–1039. <https://doi.org/10.1016/j.anbehav.2007.08.015>
- 1177 Helleu Q., P. R. Gérard, R. Dubruille, D. Ogereau, B. Prud'homme, *et al.*, 2016 Rapid evolution  
1178 of a Y-chromosome heterochromatin protein underlies sex chromosome meiotic drive.  
1179 PNAS 113: 4110–4115. <https://doi.org/10.1073/pnas.1519332113>
- 1180 Huck U. W., N. C. Pratt, J. B. Labov, and R. D. Lisk, 1988 Effects of age and parity on litter size  
1181 and offspring sex ratio in golden hamsters (*Mesocricetus auratus*). Reproduction 83:  
1182 209–214. <https://doi.org/10.1530/jrf.0.0830209>
- 1183 Ideta A., K. Hayama, C. Kawashima, M. Urakawa, A. Miyamoto, *et al.*, 2009 Subjecting holstein  
1184 heifers to stress during the follicular phase following superovulatory treatment may  
1185 increase the female sex ratio of embryos. J Reprod Dev 55: 529–533.  
1186 <https://doi.org/10.1262/jrd.20209>
- 1187 James A. C., and J. Jaenike, 1990 "sex Ratio" Meiotic Drive in *Drosophila Testacea*. Genetics  
1188 126: 651–656.
- 1189 Karp N. A., J. Mason, A. L. Beaudet, Y. Benjamini, L. Bower, *et al.*, 2017 Prevalence of sexual  
1190 dimorphism in mammalian phenotypic traits. Nature Communications 8: 15475.  
1191 <https://doi.org/10.1038/ncomms15475>
- 1192 Krackow S., 1995 Potential mechanisms for sex ratio adjustment in mammals and birds. Biol  
1193 Rev Camb Philos Soc 70: 225–241. <https://doi.org/10.1111/j.1469-185x.1995.tb01066.x>
- 1194 Kruger A. N., M. A. Brogley, J. L. Huizinga, J. M. Kidd, D. G. de Rooij, *et al.*, 2019 A  
1195 Neofunctionalized X-Linked Ampliconic Gene Family Is Essential for Male Fertility and  
1196 Equal Sex Ratio in Mice. Current Biology 29: 3699–3706.e5.  
1197 <https://doi.org/10.1016/j.cub.2019.08.057>
- 1198 Kruger A. N., and J. L. Mueller, 2021 Mechanisms of meiotic drive in symmetric and asymmetric  
1199 meiosis. Cell Mol Life Sci 78: 3205–3218. <https://doi.org/10.1007/s00018-020-03735-0>
- 1200 Le Galliard J.-F., P. S. Fitze, R. Ferrière, and J. Clobert, 2005 Sex ratio bias, male aggression,  
1201 and population collapse in lizards. Proc Natl Acad Sci U S A 102: 18231–18236.  
1202 <https://doi.org/10.1073/pnas.0505172102>

- 1203 Li H., 2013 Aligning sequence reads, clone sequences and assembly contigs with BWA-MEM.  
1204 arXiv 1303.3997.
- 1205 Lindholm A. K., K. A. Dyer, R. C. Firman, L. Fishman, W. Forstmeier, *et al.*, 2016 The Ecology  
1206 and Evolutionary Dynamics of Meiotic Drive. *Trends in Ecology & Evolution* 31: 315–  
1207 326. <https://doi.org/10.1016/j.tree.2016.02.001>
- 1208 Linklater W. L., 2007 Translocation reverses birth sex ratio bias depending on its timing during  
1209 gestation: evidence for the action of two sex-allocation mechanisms. *Reprod Fertil Dev*  
1210 19: 831–839. <https://doi.org/10.1071/rd07027>
- 1211 Love O. P., E. H. Chin, K. E. Wynne-Edwards, and T. D. Williams, 2005 Stress Hormones: A  
1212 Link between Maternal Condition and Sex-Biased Reproductive Investment. *The*  
1213 *American Naturalist* 166: 751–766. <https://doi.org/10.1086/497440>
- 1214 Lundrigan B. L., and P. K. Tucker, 1997 Evidence for multiple functional copies of the male sex-  
1215 determining locus, *Sry*, in African murine rodents. *J Mol Evol* 45: 60–65.  
1216 <https://doi.org/10.1007/pl00006202>
- 1217 Macholán M., S. J. Baird, P. Munclinger, P. Dufková, B. Bímová, *et al.*, 2008 Genetic conflict  
1218 outweighs heterogametic incompatibility in the mouse hybrid zone? *BMC Evolutionary*  
1219 *Biology* 8: 271. <https://doi.org/10.1186/1471-2148-8-271>
- 1220 McElreavy K., E. Vilain, N. Abbas, J. M. Costa, N. Souleyreau, *et al.*, 1992 XY sex reversal  
1221 associated with a deletion 5' to the *SRY* “HMG box” in the testis-determining region.  
1222 *PNAS* 89: 11016–11020.
- 1223 McNairn A. J., C.-H. Chuang, J. C. Bloom, M. D. Wallace, and J. C. Schimenti, 2019 Female-  
1224 biased embryonic death from genomic instability-induced inflammation. *Nature* 567:  
1225 105–108. <https://doi.org/10.1038/s41586-019-0936-6>
- 1226 Meiklejohn C. D., E. L. Landeen, K. E. Gordon, T. Rzatkiwicz, S. B. Kingan, *et al.*, 2018 Gene  
1227 flow mediates the role of sex chromosome meiotic drive during complex speciation, (M.  
1228 Przeworski, and D. Tautz, Eds.). *eLife* 7: e35468. <https://doi.org/10.7554/eLife.35468>
- 1229 Merçot H., A. Atlan, M. Jacques, and C. Montchamp-Moreau, 1995 Sex-ratio distortion in  
1230 *Drosophila simulans*: co-occurrence of a meiotic drive and a suppressor of drive. *Journal*  
1231 *of Evolutionary Biology* 8: 283–300. <https://doi.org/10.1046/j.1420-9101.1995.8030283.x>
- 1232 Moretti C., M. Blanco, C. Ialy-Radio, M.-E. Serrentino, C. Gobé, *et al.*, 2020 Battle of the Sex  
1233 Chromosomes: Competition between X and Y Chromosome-Encoded Proteins for  
1234 Partner Interaction and Chromatin Occupancy Drives Multicopy Gene Expression and  
1235 Evolution in Murid Rodents. *Molecular Biology and Evolution* 37: 3453–3468.  
1236 <https://doi.org/10.1093/molbev/msaa175>
- 1237 Morgan A. P., and F. Pardo-Manuel de Villena, 2017 Sequence and Structural Diversity of  
1238 Mouse Y Chromosomes. *Molecular Biology and Evolution* 34: 3186–3204.  
1239 <https://doi.org/10.1093/molbev/msx250>

- 1240 Mueller J. L., S. K. Mahadevaiah, P. J. Park, P. E. Warburton, D. C. Page, *et al.*, 2008 The  
1241 mouse X chromosome is enriched for multicopy testis genes showing postmeiotic  
1242 expression. *Nat Genet* 40: 794–799. <https://doi.org/10.1038/ng.126>
- 1243 Nagamine C. M., 1994 The testis-determining gene, SRY, exists in multiple copies in Old World  
1244 rodents. *Genet Res* 64: 151–159. <https://doi.org/10.1017/s001667230003281x>
- 1245 Nager R. G., P. Monaghan, R. Griffiths, D. C. Houston, and R. Dawson, 1999 Experimental  
1246 demonstration that offspring sex ratio varies with maternal condition. *PNAS* 96: 570–  
1247 573. <https://doi.org/10.1073/pnas.96.2.570>
- 1248 Navara K. J., 2013 Hormone-Mediated Adjustment of Sex Ratio in Vertebrates. *Integrative and*  
1249 *Comparative Biology* 53: 877–887. <https://doi.org/10.1093/icb/ict081>
- 1250 Ober C., D. A. Loisel, and Y. Gilad, 2008 Sex-Specific Genetic Architecture of Human Disease.  
1251 *Nat Rev Genet* 9: 911–922. <https://doi.org/10.1038/nrg2415>
- 1252 Odet F., W. Pan, T. A. Bell, S. G. Goodson, A. M. Stevans, *et al.*, 2015 The Founder Strains of  
1253 the Collaborative Cross Express a Complex Combination of Advantageous and  
1254 Deleterious Traits for Male Reproduction. *G3 (Bethesda)* 5: 2671–2683.  
1255 <https://doi.org/10.1534/g3.115.020172>
- 1256 Pedersen B. S., and A. R. Quinlan, 2018 Mosdepth: quick coverage calculation for genomes  
1257 and exomes. *Bioinformatics* 34: 867–868. <https://doi.org/10.1093/bioinformatics/btx699>
- 1258 Phadnis N., and H. A. Orr, 2009 A Single Gene Causes Both Male Sterility and Segregation  
1259 Distortion in *Drosophila* Hybrids. *Science* 323: 376–379.  
1260 <https://doi.org/10.1126/science.1163934>
- 1261 Philip V. M., G. Sokoloff, C. L. Ackert-Bicknell, M. Striz, L. Branstetter, *et al.*, 2011 Genetic  
1262 analysis in the Collaborative Cross breeding population. *Genome Res.* 21: 1223–1238.  
1263 <https://doi.org/10.1101/gr.113886.110>
- 1264 Regitz-Zagrosek V., 2012 Sex and gender differences in health. *EMBO reports* 13: 596–603.  
1265 <https://doi.org/10.1038/embor.2012.87>
- 1266 Robinson J. T., H. Thorvaldsdóttir, W. Winckler, M. Guttman, E. S. Lander, *et al.*, 2011  
1267 Integrative Genomics Viewer. *Nat Biotechnol* 29: 24–26. <https://doi.org/10.1038/nbt.1754>
- 1268 Rogala A. R., A. P. Morgan, A. M. Christensen, T. J. Gooch, T. A. Bell, *et al.*, 2014 The  
1269 Collaborative Cross as a Resource for Modeling Human Disease: CC011/Unc, a New  
1270 Mouse Model for Spontaneous Colitis. *Mamm Genome* 25: 95–108.  
1271 <https://doi.org/10.1007/s00335-013-9499-2>
- 1272 Rosenfeld C. S., K. M. Grimm, K. A. Livingston, A. M. Brokman, W. E. Lamberson, *et al.*, 2003  
1273 Striking variation in the sex ratio of pups born to mice according to whether maternal diet  
1274 is high in fat or carbohydrate. *PNAS* 100: 4628–4632.  
1275 <https://doi.org/10.1073/pnas.0330808100>



- 1276 Rutledge H., D. L. Aylor, D. E. Carpenter, B. C. Peck, P. Chines, *et al.*, 2014 Genetic Regulation  
1277 of Zfp30, CXCL1, and Neutrophilic Inflammation in Murine Lung. *Genetics* 198: 735–  
1278 745. <https://doi.org/10.1534/genetics.114.168138>
- 1279 Ryan C. P., W. G. Anderson, L. E. Gardiner, and J. F. Hare, 2012 Stress-induced sex ratios in  
1280 ground squirrels: support for a mechanistic hypothesis. *Behavioral Ecology* 23: 160–167.  
1281 <https://doi.org/10.1093/beheco/arr169>
- 1282 Sarrate Z., and E. Anton, 2009 Fluorescence in situ hybridization (FISH) Protocol in Human  
1283 Sperm. *J Vis Exp*. <https://doi.org/10.3791/1405>
- 1284 Scavetta R. J., and D. Tautz, 2010 Copy Number Changes of CNV Regions in Intersubspecific  
1285 Crosses of the House Mouse. *Molecular Biology and Evolution* 27: 1845–1856.  
1286 <https://doi.org/10.1093/molbev/msq064>
- 1287 Schindelin J., I. Arganda-Carreras, E. Frise, V. Kaynig, M. Longair, *et al.*, 2012 Fiji: an open-  
1288 source platform for biological-image analysis. *Nat Meth* 9: 676–682.  
1289 [http://www.nature.com/nmeth/journal/v9/n7/abs/nmeth.2019.html#supplementary-](http://www.nature.com/nmeth/journal/v9/n7/abs/nmeth.2019.html#supplementary-information)  
1290 [information](http://www.nature.com/nmeth/journal/v9/n7/abs/nmeth.2019.html#supplementary-information)
- 1291 Seehausen, V. Alphen, and Lande, 1999 Color polymorphism and sex ratio distortion in a cichlid  
1292 fish as an incipient stage in sympatric speciation by sexual selection. *Ecology Letters* 2:  
1293 367–378. <https://doi.org/10.1046/j.1461-0248.1999.00098.x>
- 1294 Shorter J. R., F. Odet, D. L. Aylor, W. Pan, C.-Y. Kao, *et al.*, 2017 Male Infertility Is Responsible  
1295 for Nearly Half of the Extinction Observed in the Mouse Collaborative Cross. *Genetics*  
1296 206: 557.
- 1297 Shorter J. R., P. L. Maurizio, T. A. Bell, G. D. Shaw, D. R. Miller, *et al.*, 2019a A Diallel of the  
1298 Mouse Collaborative Cross Founders Reveals Strong Strain-Specific Maternal Effects on  
1299 Litter Size. *G3 (Bethesda)* 9: 1613–1622. <https://doi.org/10.1534/g3.118.200847>
- 1300 Shorter J. R., M. L. Najarian, T. A. Bell, M. Blanchard, M. T. Ferris, *et al.*, 2019b Whole Genome  
1301 Sequencing and Progress Toward Full Inbreeding of the Mouse Collaborative Cross  
1302 Population. *G3: Genes, Genomes, Genetics* 9: 1303–1311.  
1303 <https://doi.org/10.1534/g3.119.400039>
- 1304 Sigmon J. S., M. W. Blanchard, R. S. Baric, T. A. Bell, J. Brennan, *et al.*, 2020 Content and  
1305 Performance of the MiniMUGA Genotyping Array: A New Tool To Improve Rigor and  
1306 Reproducibility in Mouse Research. *Genetics* 216: 905–930.  
1307 <https://doi.org/10.1534/genetics.120.303596>
- 1308 Soh Y. Q. S., J. Alföldi, T. Pyntikova, L. G. Brown, T. Graves, *et al.*, 2014 Sequencing the  
1309 Mouse Y Chromosome Reveals Convergent Gene Acquisition and Amplification on Both  
1310 Sex Chromosomes. *Cell* 159: 800–813. <http://dx.doi.org/10.1016/j.cell.2014.09.052>
- 1311 Srivastava A., A. P. Morgan, M. L. Najarian, V. K. Sarsani, J. S. Sigmon, *et al.*, 2017 Genomes  
1312 of the Mouse Collaborative Cross. *Genetics* 206: 537.
- 1313 Svenson K. L., D. M. Gatti, W. Valdar, C. E. Welsh, R. Cheng, *et al.*, 2012 High-Resolution  
1314 Genetic Mapping Using the Mouse Diversity Outbred Population. *Genetics* 190: 437.

- 1315 Székely T., F. J. Weissing, and J. Komdeur, 2014 Adult sex ratio variation: implications for  
1316 breeding system evolution. *J Evol Biol* 27: 1500–1512. <https://doi.org/10.1111/jeb.12415>
- 1317 Tao Y., D. L. Hartl, and C. C. Laurie, 2001 Sex-ratio segregation distortion associated with  
1318 reproductive isolation in *Drosophila*. *PNAS* 98: 13183–13188.  
1319 <https://doi.org/10.1073/pnas.231478798>
- 1320 Turner L. M., D. J. Schwahn, and B. Harr, 2012 Reduced Male Fertility Is Common but Highly  
1321 Variable in Form and Severity in a Natural House Mouse Hybrid Zone. *Evolution* 66:  
1322 443–458. <https://doi.org/10.1111/j.1558-5646.2011.01445.x>
- 1323 Unckless R. L., A. M. Larracuente, and A. G. Clark, 2015 Sex-Ratio Meiotic Drive and Y-Linked  
1324 Resistance in *Drosophila affinis*. *Genetics* 199: 831–840.  
1325 <https://doi.org/10.1534/genetics.114.173948>
- 1326 Van der Auwera G. A., and B. D. O'Connor, 2020 *Genomics in the Cloud: Using Docker, GATK,*  
1327 *and WDL in Terra*. O'Reilly Media.
- 1328 West S. A., and B. C. Sheldon, 2002 Constraints in the Evolution of Sex Ratio Adjustment.  
1329 *Science* 295: 1685–1688. <https://doi.org/10.1126/science.1069043>
- 1330 Wilson Sayres M. A., 2018 Genetic Diversity on the Sex Chromosomes. *Genome Biology and*  
1331 *Evolution* 10: 1064–1078. <https://doi.org/10.1093/gbe/evy039>
- 1332 Wood R. J., and M. E. Newton, 1991 Sex-Ratio Distortion Caused by Meiotic Drive in  
1333 Mosquitoes. *The American Naturalist* 137: 379–391. <https://doi.org/10.1086/285171>
- 1334 Yang H., T. A. Bell, G. A. Churchill, and F. Pardo-Manuel de Villena, 2007 On the subspecific  
1335 origin of the laboratory mouse. *Nature Genetics* 39: 1100.  
1336 <https://doi.org/10.1038/ng2087> [https://www.nature.com/articles/ng2087#supplementary-](https://www.nature.com/articles/ng2087#supplementary-information)  
1337 [information](https://www.nature.com/articles/ng2087#supplementary-information)
- 1338 Zanders S. E., and R. L. Unckless, 2019 Fertility Costs of Meiotic Drivers. *Current Biology* 29:  
1339 R512–R520. <https://doi.org/10.1016/j.cub.2019.03.046>
- 1340
